1 **Regulation of nucleolar dominance in *Drosophila melanogaster***

2

3 Natalie Warsinger-Pepe<sup>\*,†</sup>, Duoja Li<sup>†,‡</sup>, Yukiko M. Yamashita<sup>†,§,\*\*</sup>

4

5 <sup>\*</sup>Department of Molecular and Integrative Physiology

6 <sup>†</sup>Life Sciences Institute

7 <sup>‡</sup>Molecular, Cellular and Developmental Biology

8 <sup>§</sup>Cell and Developmental Biology

9 <sup>\*\*</sup>Howard Hughes Medical Institute,

10 University of Michigan, Ann Arbor

11

12

1 ***D. melanogaster* nucleolar dominance**

2

3 Key words/phrases:

4 Nucleolar dominance

5 rDNA

6 *Drosophila*

7

8 Corresponding author information:

9 Yukiko Yamashita

10

11 Life Sciences Institute

12 Room 5183

13 210 Washtenaw Avenue

14 Ann Arbor, MI

15 48109-2216

16

17 (734) 615-8508

18 yukikomy@umich.edu

19

1 **Abstract**

2

3 In eukaryotic genomes, ribosomal RNA (rRNA) genes exist as tandemly repeated  
4 clusters, forming ribosomal DNA (rDNA) loci. Each rDNA locus typically contains  
5 hundreds of rRNA genes to meet the high demand of ribosome biogenesis. Nucleolar  
6 dominance is a phenomenon, whereby individual rDNA loci are entirely silenced or  
7 transcribed, and is believed to be a mechanism to control rRNA dosage. Nucleolar  
8 dominance was originally noted to occur in interspecies hybrids, and has been shown to  
9 occur within a species (i.e. non-hybrid contexts). However, studying nucleolar  
10 dominance within a species has been challenging due to the highly homogenous  
11 sequence across rDNA loci. By utilizing single nucleotide polymorphisms (SNPs)  
12 between X rDNA vs. Y rDNA loci in males, as well as sequence variations between two  
13 X rDNA loci in females, we conducted a thorough characterization of nucleolar  
14 dominance throughout development of *D. melanogaster*. We demonstrate that nucleolar  
15 dominance is a developmentally-regulated program, where Y rDNA dominance is  
16 established during male embryogenesis, whereas females normally do not exhibit  
17 dominance between two X rDNA loci. By utilizing various chromosomal complements  
18 (e.g. X/Y, X/X, X/X/Y) and a chromosome rearrangement, we show that Y chromosome  
19 rDNA likely contains *cis* elements that dictate its dominance over the X chromosome  
20 rDNA. Our study begins to reveal the mechanisms underlying the selection of rDNA loci  
21 for activation/silencing in nucleolar dominance.

22

23

## 1 Introduction

2  
3 Ribosomal DNA (rDNA), genes encoding the catalytic RNA components of ribosomes,  
4 is highly repetitive (100s to 1000s of copies) and often exists as multiple loci on  
5 separate chromosomes (e.g. 2 loci in *Drosophila melanogaster*, 4 in *Arabidopsis*, 6 in  
6 *Mus musculus*, 10 in *Homo sapiens* per diploid genome) (Long and Dawid 1980, Pontes  
7 et al. 2004). This expansive copy number may come to no surprise, considering that the  
8 transcription of rDNA accounts for ~60% of the total transcription of a metabolically  
9 active cell (Moss and Stefanovsky 2002). The regulation of ribosomal RNA (rRNA)  
10 expression is critically important for adjusting cellular energetic expenditure: when  
11 nutrients are low rRNA synthesis is downregulated, whereas the opposite occurs when  
12 nutrients are high or growth rate is increased (e.g. in cancer) (Smetana and Busch  
13 1964, Busch et al. 1979, Ghoshal et al. 2004, Grewal et al. 2005, Murayama et al. 2008,  
14 Aldrich and Maggert 2015). Accordingly, transcription of rRNA is expected to require  
15 precise regulation.

16  
17 A phenomenon called nucleolar dominance, whereby individual rDNA loci are either  
18 entirely expressed or silenced, is proposed to be a mechanism that regulates the  
19 dosage of rRNA (Preuss and Pikaard 2007). Nucleolar dominance has been noted to be  
20 one of the largest epigenetic mechanisms, second only to X-inactivation in eutherian  
21 mammals (Pikaard 2000). Nucleolar dominance was originally discovered in  
22 interspecies hybrids (i.e. *Xenopus* hybrids (Cassidy and Blackler 1974), *Arabidopsis*  
23 hybrids (Chen et al. 1998), *Drosophila* hybrids (Durica and Krider 1977), and mouse-  
24 human hybrid cell lines (Croce et al. 1977)), where rDNA loci inherited from one species  
25 are preferentially expressed and those from the other are silenced. Later, nucleolar  
26 dominance was shown to occur within a species (i.e. non-hybrid context) (Lawrence et  
27 al. 2004, Greil and Ahmad 2012, Zhou et al. 2012), indicating that nucleolar dominance  
28 is a mechanism to regulate rRNA expression/dosage instead of a result of interspecies  
29 incompatibility.

30  
31 Nucleolar dominance has been thoroughly studied in *Arabidopsis*, both in *A. suecica*  
32 (the interspecies hybrid between *A. thaliana* crossed to *A. arenosa*) as well as non-  
33 hybrid *A. thaliana* (Pontes et al. 2007, Earley et al. 2010). In both cases, nucleolar  
34 dominance is gradually established during development, where seedling cotyledons  
35 express rRNA from all rDNA loci (i.e. 'co-dominance'), transitioning to preferential  
36 expression of certain loci in mature tissues (Pontes et al. 2007, Earley et al. 2010).  
37 Several mechanisms have been shown to mediate the silencing of chosen rDNA loci,  
38 including small interfering RNAs (siRNAs) (Pontes et al. 2006, Preuss et al. 2008), DNA  
39 methylation (Chen et al. 1998, Lawrence et al. 2004, Pontes et al. 2006, Preuss et al.  
40 2008, Costa-Nunes et al. 2010, Earley et al. 2010), histone methylation (Earley et al.  
41 2010, Pontvianne et al. 2012), and histone deacetylation (Probst et al. 2004, Earley et  
42 al. 2006, Earley et al. 2010). These mechanisms reveal how the large-scale silencing of  
43 rDNA is implemented to achieve nucleolar dominance, however, what factor(s)  
44 influence the choice of which rDNA loci are silenced or activated remain elusive.

1 Nucleolar dominance is likely a wide-spread phenomenon across many species. For  
2 example, only a subset of rDNA loci are transcribed in human cell lines (Roussel et al.  
3 1996) and human lymphocytes (Roussel et al. 1996, Heliot et al. 2000), implying that  
4 these cells also undergo nucleolar dominance. Nucleolar dominance was found to occur  
5 in *D. melanogaster* larval neuroblasts, where rDNA on the Y chromosome ('Y rDNA')  
6 dominates over rDNA on the X chromosome ('X rDNA'), based on transcription-  
7 dependent deposition of GFP-tagged histone H3.3 onto the active rDNA locus (i.e. the Y  
8 rDNA locus) (Greil and Ahmad 2012). This method relied on readily available mitotic  
9 chromosome spreads, leaving the assessment of nucleolar dominance in other cell  
10 types elusive. Recently, we adapted a single nucleotide polymorphism (SNP) RNA  
11 fluorescent *in situ* hybridization (SNP *in situ*) protocol and showed that nucleolar  
12 dominance (Y rDNA dominance) also occurs in male germline stem cells (Levesque et  
13 al. 2013, Lu et al. 2018). This method utilizes SNPs between X rDNA vs. Y rDNA to  
14 differentially label their products (X- vs. Y-derived rRNA), allowing assessment of  
15 nucleolar dominance without requiring mitotic chromosome spreads.

16  
17 In this study, we utilized SNP *in situ* to comprehensively examine the state of nucleolar  
18 dominance in *D. melanogaster* during development and across different tissues. We  
19 show that nucleolar dominance in *D. melanogaster* is gradually established during  
20 development, similar to the observations in *A. thaliana*, supporting the notion that  
21 nucleolar dominance is a regulatory mechanism that occurs in non-hybrid organisms.  
22 We have further examined the state of nucleolar dominance between two X rDNA loci in  
23 females by isolating X rDNA with distinct sequences that enables RNA *in situ*  
24 hybridization to distinguish transcripts from two X rDNA loci. Our results show that the  
25 two X rDNA loci in females exhibit co-dominance in essentially all tissues, expanding  
26 the previous finding of co-dominance in female larval neuroblasts (Greil and Ahmad  
27 2012). Moreover, by utilizing the various karyotypes (e.g. X/X females, X/Y males, vs.  
28 X/X/Y females) and a chromosome rearrangement strain, we show that Y chromosome  
29 element(s) (within Y rDNA as well as non-rDNA element(s) of the Y chromosome) may  
30 aid in the 'choice' mechanism that preferentially activates the Y rDNA locus and/or  
31 silences the X rDNA locus. These results provide insights into how specific rDNA loci  
32 may be preferentially transcribed or silenced, and will provide the foundation for future  
33 studies aimed at understanding how rDNA loci are chosen for activation/silencing to  
34 achieve nucleolar dominance.

## 35 36 **Materials and Methods**

### 37 38 ***Fly husbandry and strains***

39 All fly stocks (See [Reagent Table](#)) were raised on standard Bloomington medium at  
40 room temperature. Unless otherwise stated, all flies used for wild-type experiments  
41 were the standard lab wild-type strain  $y^1w^1$ , referred to as *yw*, that contains the X and Y  
42 chromosomes with mapped rDNA SNPs (Lu et al. 2018) (see [Reagent Table](#)). Stocks  
43 used to study female nucleolar dominance were obtained from the UC San Diego  
44 *Drosophila* Stock Center and the culture was established by using single pair parents to  
45 minimize heterogeneity of rDNA within each stock.

46

1 The X and Y chromosomes from wild type (*yw*) were introduced to genotypes of interest  
2 analyzed in this study to keep their rDNA loci consistent across experiments. When it  
3 was not feasible to introduce wild type (*yw*) X/Y chromosomes into a genetic  
4 background of interest, their rDNA was sequenced to find SNPs between the X and Y  
5 rDNA (see below).  
6

### 7 ***RNA in situ hybridization***

8 Third instar larval or adult tissues were dissected in RNase-free 1X PBS, fixed in RNase-  
9 free 4% formaldehyde, and incubated overnight in 70% EtOH at 4° to permeabilize the  
10 tissues. Embryos were collected according to a modified protocol from (Wilk et al. 2010)  
11 by allowing parents to lay eggs on an apple-agar plate at room temperature for a range  
12 of collection time (3 – 17hrs). Embryos were transferred to glass scintillation vials with  
13 glass Pasteur pipettes and were washed of any yeast in 1X PBS then dechorionated in  
14 50% bleach for 30 sec and washed again in PBS. The embryos were then devitellinized  
15 and fixed in 50:50 heptane:4% RNase-free formaldehyde during vigorous, manual  
16 shaking for 20 min, then again in 50:50 heptane:methanol twice for 30 sec, washed in  
17 methanol then stored in methanol at -20° for at least one night before proceeding to *in*  
18 *situ* hybridization.  
19

20 *In situ* hybridization was performed as previously described with slight modifications (Lu  
21 et al. 2018). In short, samples were washed with wash buffer (10% formamide in 1X  
22 SSC and 0.1% Tween-20) for 5 min, then incubated with the hybridization mix (10%  
23 formamide, 1X SSC, 10% Dextran sulfate (w/v) (Sigma, D8906), 100nM each *in situ*  
24 probe, and 300nM each mask oligo (for SNP *in situ*) overnight in a 37° water bath.  
25 Samples were then washed twice in wash buffer for 30 min each at 37° and stored in  
26 Vectashield H-1200 (Vector Laboratories) with DAPI. Hybridization and washes for X/X  
27 females were performed at 42°. Images were taken using a Leica TCS SP8 confocal  
28 microscope with 63X oil-immersion objectives and processed using Adobe Photoshop  
29 software.  
30

31 See [Reagent Table](#) for fluorescent *in situ* oligonucleotide probes. SNP *in situ*  
32 oligonucleotide probes were custom ordered from Biosearch Technologies (Lu et al.  
33 2018). Fluorescent *in situ* oligonucleotide probes used to study female nucleolar  
34 dominance were designed using Integrated DNA Technologies Oligo Analyzer.  
35

### 36 ***Identification of SNPs in rDNA***

37 To sequence X rDNA, genomic DNA was extracted from 10-15 female flies of a  
38 genotype of interest. To sequence Y rDNA, male flies of the genotype of interest were  
39 crossed to C(1)DX/Y female flies, which lack X rDNA, and 10-15 female progeny (which  
40 have the Y chromosome of interest and C(1)DX) was subjected to genomic DNA  
41 extraction. PCR was performed on the extracted genomic DNA to amplify three regions  
42 of the rDNA with the following primers:

43 18S: (forward) 5'- GAAACGGCTACACATCTAAGG-3' and (reverse) 5'-  
44 GGACCTCTCGGTCTAGGAAATA-3'.

45 ITS1: (forward) 5'- CTTGCGTGTACGGTTGTTTC-3' and (reverse) 5'-  
46 ACAGCATGGACTGCGATATG-3'.

1 28S: (forward) 5'-AGCCCGATGAACCTGAATATC-3' and (reverse) 5'-  
2 CATGCTCTTCTAGCCCATCTAC-3' (Lu et al. 2018).

3  
4 PCR products were verified by agarose gel electrophoresis and purified using a PCR  
5 Purification Kit (Qiagen). Sanger sequencing was performed on the purified PCR  
6 products using the same PCR primers (University of Michigan Biomedical Research  
7 DNA Sequencing Core Facility). Sequencing data was analyzed using the free  
8 downloadable software ApE: A plasmid Editor, by M. Wayne Davis. 4 SNPs between  
9 the X and Y rDNA were previously found (Lu et al. 2018) and a combination of 3-4 of  
10 the SNP probes were used depending on the presence or absence of SNPs in the  
11 specific strain (see [Reagent Table](#)). Unless otherwise stated, all 4 SNP probes (SNPs  
12 1-4) were used for *in situ* hybridization.

### 13 14 ***Larval brain squash and DNA FISH on mitotic chromosomes***

15 We utilized a modified DNA fluorescent *in situ* hybridization (FISH) protocol described  
16 previously (Larracuenta and Ferree 2015, Jagannathan et al. 2017). In short, third instar  
17 larvae were collected and brains were dissected in 1X PBS. Larval brains were fixed in  
18 45:55 acetic acid:4% formaldehyde in PBS on Superfrost Plus Microscope Slides  
19 (Fisherbrand 22-037-246). The sample was then covered with a coverslip, manually  
20 squashed, and submerged in liquid nitrogen until frozen. The coverslips were quickly  
21 removed and the slides were treated with 100% ethanol at room temperature for 5 min.  
22 20µL of hybridization buffer (50% formamide, 10% dextran sulfate, 2X SSC buffer,  
23 0.5µM of each probe) was added to the sample, covered with a cover slip, and the  
24 sample was heat-denatured at 95° for 5 min, followed by incubation in a humid chamber  
25 in the dark overnight at room temperature. Samples were washed three times for 15 min  
26 in 0.1X SSC and then mounted in Vectashield H-1200 (Vector Laboratories) with DAPI.  
27 Probe sequences are provided in the [Reagent Table](#).

### 28 29 ***Immunofluorescence on mitotic chromosome spreads***

30 A protocol described in (Blum et al. 2017) was used to conduct immunofluorescence on  
31 mitotic chromosome spreads. Briefly, larval brains from third instar larvae were  
32 dissected and incubated in 30µL of 0.5% sodium citrate on Superfrost Plus Microscope  
33 Slides (Fisherbrand 22-037-246) for 10-20 min. Sodium citrate was gently removed  
34 using a micropipette. 25µL of 4% formaldehyde was gently added to the slide over the  
35 sample, removed with a micropipette and replaced with another fresh 25µL of 4%  
36 formaldehyde and fixed for 4 min. During fixation, the larval brains were dissected into  
37 smaller pieces. Any imaginal discs and/or the ventral nerve cord were removed during  
38 this process. After fixation, the sample was covered with a coverslip, squashed and  
39 submerged in liquid nitrogen until frozen. After removal of the coverslips, slides were  
40 washed in PBS for 30 - 60 min and incubated overnight with primary antibodies  
41 (Chicken anti-Cid, 1:200) in 3% BSA in 1X PBST at 4° in a humid chamber. The slides  
42 were washed in 1X PBST, three times for 20 min each, then incubated with secondary  
43 antibodies (Goat anti-Chicken Alexa Fluor 488 Invitrogen, A-11039, 1:200) in 3% BSA in  
44 1X PBST for 45 min at room temperature in a humid chamber in the dark. Slides were  
45 washed in 1X PBST, three times for 20 min and mounted in Vectashield H-1200 (Vector  
46 Laboratories) with DAPI. Antibodies are listed in the [Reagent Table](#).

1  
2 **Quantification and statistical analysis of nucleolar dominance**  
3 Nucleolar dominance was quantified manually from images generated using a Leica  
4 TCS SP8 confocal microscope. For each embryo, larval brain, imaginal disc, larval  
5 anterior midgut, and adult anterior midgut sample, 1-3 representative images of each  
6 tissue were captured for scoring purposes. Imaginal discs were randomly scored  
7 without intentionally excluding any imaginal disc type, therefore all imaginal discs were  
8 included in the category of ‘discs’ for scoring purposes. Z-stacks were generated with  
9 maximum projections for pre-gastrulation embryos, larval anterior midgut and adult  
10 anterior midgut images for scoring. Whole tissues were scored for salivary glands and  
11 larval fat bodies. All cells were identified and scored based on nuclear DAPI staining  
12 and morphology. Note that call of dominance vs. co-dominance was straightforward,  
13 owing to consistent signal intensity across samples based on the RNA *in situ* procedure  
14 described above. The number of cells and the number of tissues scored per genotype  
15 are listed in each corresponding figure legend and in [Table S1](#). p-values were  
16 calculated using Welch’s unpaired, unequal variances Student’s *t*-test with *n*  
17 representing number of tissues scored.

### 18 **Data availability**

19 *Drosophila* strains and reagents are listed in the [Reagent Table](#) and/or above. Raw  
20 scoring data are provided in [Table S1](#).  
21  
22  
23

## 24 **Results**

### 25 ***Y rDNA dominance is gradually established during male development.***

26 Thorough characterization of nucleolar dominance within a species (i.e. in the context of  
27 non-hybrids) has been limited to *A. thaliana* (Tucker et al. 2010). To extend the analysis  
28 of nucleolar dominance in *D. melanogaster*, which has been limited to larval neuroblasts  
29 and adult male germline cells (Greil and Ahmad 2012, Lu et al. 2018), we applied the  
30 SNP *in situ* hybridization method that differentiates X rDNA-derived rRNA vs. Y rDNA-  
31 derived rRNA (Lu et al. 2018) and comprehensively analyzed the state of nucleolar  
32 dominance during development of *D. melanogaster* ([Figure 1A](#)). In all experiments  
33 reported in this study, X and Y chromosomes with defined rDNA SNPs from a wild type  
34 strain (*yw*) were introduced into the genetic background of interest. Alternatively, distinct  
35 SNPs were identified by sequencing X and Y rDNA loci, if introduction of the *yw* strain  
36 sex chromosomes was complicated/impossible (see Materials and Methods).  
37  
38

39 We first focused on nucleolar dominance in male embryos: 48.6% of the total embryos  
40 scored (*n* = 368) contained both the Y rDNA and X rDNA SNP signals, which we  
41 deemed as male embryos. Note that not all nuclei within an embryo necessarily  
42 contained both X rRNA and Y rRNA signals, but the presence of any Y rRNA-containing  
43 nuclei within an embryo indicates that they are male embryos. On the contrary, 51.4%  
44 of embryos contained only X rDNA SNP signal in all nuclei within an entire embryo,  
45 which were deemed as female embryos. Since our SNP *in situ* probes cannot  
46 discriminate rRNA signals from two X rDNA loci in females, their state of nucleolar



1 dominance cannot be determined by these experiments (Figure 1G-J) (see below for  
2 nucleolar dominance in females). We found that in early male embryos (pre-  
3 gastrulating, around syncytial cycle 13-14), the majority of nuclei expressed both the X  
4 and Y rDNA (i.e. co-dominant) ( $94.8 \pm 13.2\%$ ) (Figure 1B-D). It has been reported that  
5 larval neuroblasts (Greil and Ahmad 2012), male germline stem cells (GSCs) and  
6 spermatogonia (Lu et al. 2018) exhibit Y rDNA dominance, suggesting that nucleolar  
7 dominance may be established during the course of development. To address this  
8 possibility, we examined the state of nucleolar dominance along the course of  
9 development through embryonic stages, larval development and into adulthood.  
10 Although the pre-gastrulating embryos exhibited high frequency of co-dominance  
11 ( $\sim 95\%$ ), we observed a decrease in the percentage of co-dominant nuclei, with a  
12 concomitant increase in Y rDNA-dominant cells as male embryos progressed through  
13 development (Figure 1B-F). Male embryos during early gastrula or germband extension  
14 stages show  $55.3 \pm 27.5\%$  co-dominant nuclei and  $42.9 \pm 27.0\%$  Y rDNA dominant  
15 nuclei (Figure 1B-F). Later during segmentation, co-dominant nuclei further decreased  
16 to  $33.7 \pm 7.1\%$ , as Y rDNA dominant nuclei increased to  $64.6 \pm 7.9\%$  (Figure 1B).

17  
18 As development proceeds to the larval stage, we observed much higher rates of Y  
19 rDNA dominance in most tissues: larval brains ( $83.5 \pm 4.6\%$ ) similar to what has been  
20 previously reported (Greil and Ahmad 2012), imaginal discs ( $93.6 \pm 3.1\%$ ), larval fat  
21 bodies ( $95.8 \pm 5.1\%$ ), and larval anterior midgut enterocytes ( $82.9 \pm 12.1\%$ ) (Figure 2A,  
22 2C-I). Salivary glands, which undergo a high degree of polyploidization, showed only a  
23 moderate degree of Y rDNA dominance ( $51 \pm 19.4\%$ ) (Figure 2A-B). Y rDNA dominance  
24 in the anterior midgut further increased in the adult (from  $82.9\% \pm 12.1\%$  in third instar  
25 larvae to  $99.7 \pm 0.7\%$  in adult) (Figure 2A, 2J-K). These data suggest that nucleolar  
26 dominance in *D. melanogaster* males is gradually established over the course of  
27 development. This is similar to what was reported in *Arabidopsis* (Pontes et al. 2007,  
28 Earley et al. 2010), where seedling cotyledons exhibit co-dominance and nucleolar  
29 dominance is established in later stages of development.

30  
31  
32 ***Histone methyltransferase Su(var)3-9 aids in the establishment of Y rDNA***  
33 ***dominance in males across tissues.***

34 Small interfering RNAs (siRNAs) in *Arabidopsis* (Preuss et al. 2008) and long non-  
35 coding, promoter-associated RNAs in mammalian cell lines (Mayer et al. 2006) were  
36 shown to regulate rDNA silencing. These non-coding RNAs recruit factors that induce  
37 heterochromatinization of rDNA through DNA methylation (Lawrence et al. 2004, Preuss  
38 et al. 2008, Schmitz et al. 2010), histone methylation (Lawrence et al. 2004, Santoro  
39 and Grummt 2005, Pontvianne et al. 2012) and histone deacetylation (Santoro and  
40 Grummt 2005, Earley et al. 2006). The small RNA pathway and heterochromatin factors  
41 have also been shown to influence nucleolar morphology in *D. melanogaster* larval  
42 tissues, which may reflect disrupted rDNA expression (Peng and Karpen 2007). Based  
43 on these previous studies, we wondered whether the small RNA machinery and/or  
44 heterochromatin formation play a role in nucleolar dominance in *D. melanogaster*. To  
45 test this, we assessed nucleolar dominance in the mutants of *dicer-2*, an endonuclease  
46 critical for the siRNA pathways, or *Su(var)3-9*, a histone methyltransferase critical for

1 depositing heterochromatin-associated histone methylation. We found that *dcr-2*<sup>L811fsx/</sup>  
2 *dcr-2*<sup>p[f06544]</sup> mutants showed only a slight (although statistically significant) change in Y  
3 rDNA dominance in larval brains (71.4 ± 7.5% compared to control 83.5 ± 4.6%) and  
4 imaginal discs (81.8 ± 10.9% compared to control 93.6 ± 3.1%) (Figure 3A-B, 3C-D, 3F-  
5 G), suggesting that the siRNA mechanism might not play an important role in nucleolar  
6 dominance, as opposed to what is reported in *Arabidopsis* (Pontes et al. 2006, Preuss  
7 et al. 2008). *Su(var)3-9*<sup>1</sup>/*Su(var)3-9*<sup>2</sup> mutants showed a marked decrease in Y rDNA  
8 dominance in larval brain (46.5 ± 16.5%, compared to control 83.5 ± 4.6%) and imaginal  
9 discs (61.4 ± 21.0%, compared to control 93.6 ± 3.1%) (Figure 3A-B, 3C, 3E, 3F, 3H),  
10 consistent with the previous finding that *Su(var)3-9* is involved in silencing of X rDNA in  
11 male neuroblasts (Greil and Ahmad 2012). *dicer-2* mutants and *Su(var)3-9* mutants had  
12 minimal effects on nucleolar dominance in polyploid tissues (salivary glands, larval fat  
13 bodies, larval anterior midgut, and adult anterior midgut enterocytes) (Figure S1A-D).  
14 These results suggest that the small RNA pathway is most likely not important for Y  
15 rDNA dominance, whereas heterochromatin formation is important for Y rDNA  
16 dominance in diploid tissues in *D. melanogaster*.

17

### 18 **Nucleolar dominance does not occur in X/X females across tissues.**

19 It was previously shown that nucleolar dominance does not occur in female larval  
20 neuroblasts (Greil and Ahmad 2012). We sought to determine the state of nucleolar  
21 dominance in females (between two X rDNA loci) across tissues and developmental  
22 stages. Doing so requires two distinct X rDNA loci with detectable differences, similar to  
23 SNP *in situ* hybridization described above for X vs. Y rDNA. Our initial searches for  
24 SNPs between X rDNA loci from multiple laboratory strains revealed no SNPs (see  
25 Materials and Methods). However, sequencing of X rDNA from geographically  
26 separated *D. melanogaster* strains led us to the identification of a 24-bp deletion in the  
27 internal transcribed spacer (ITS1) of the X rDNA in a strain originating from Guam,  
28 compared to most other strains sequenced (i.e. yw, Oregon-R, Canton-S, Beijing,  
29 Pohnpei, Samoa, Port Moresby, Le Réduit) (see Materials and Methods, Figure 4A). We  
30 designed oligonucleotide probes to distinguish the rRNA from the Guam strain (ITS<sup>Δ24</sup>)  
31 vs. other strains (ITS<sup>+</sup>) (see Materials and Methods, Figure 4A). The Guam strain  
32 exhibited signals only from ITS<sup>Δ24</sup> (Figure S2). Among other strains that have the ITS<sup>+</sup>  
33 variant, the Le Réduit strain had the least background signal with the ITS<sup>Δ24</sup> probe  
34 (Figure S2), whereas females from other strains revealed weak ITS<sup>Δ24</sup> signal in addition  
35 to predominant ITS<sup>+</sup> signal (data not shown), possibly because these strains may  
36 contain a small fraction of rDNA copies with the ITS<sup>Δ24</sup> variant. Based on these results,  
37 we decided to utilize the Guam and Le Réduit strains to determine the state of nucleolar  
38 dominance between two X rDNA loci in females.

39

40 We crossed Guam strain males with Le Réduit strain females and tissues from the  
41 resulting F1 females were assessed for the state of nucleolar dominance by RNA *in situ*  
42 using the ITS<sup>Δ24</sup> and ITS<sup>+</sup> probes (Figure 4B). We found that X/X female cells  
43 predominantly show expression from both rDNA loci (i.e. co-dominant) in larval brains  
44 (67.1 ± 15.6% co-dominant) (Figure 4C). We found that X/X female larval imaginal discs  
45 also exhibit primarily co-dominance (77.3 ± 8.1%) (Figure 4C). Adult tissues revealed  
46 even higher rates of co-dominance compared to larval tissues: anterior midgut

1 enterocytes ( $97.6 \pm 2.1\%$  co-dominance) and GSCs ( $96.8 \pm 10.7\%$  co-dominance)  
2 (Figure 4C-E). It should be noted that we did not assess nucleolar dominance in female  
3 embryos because the Guam strain Y rDNA shares the same ITS sequence as Le Réduit  
4 X rDNA (ITS<sup>+</sup>), making the accurate sexing of embryos impossible. However, female  
5 embryos in the experiments described in Figure 1H-J mostly exhibited two nucleoli per  
6 nucleus, suggesting that female embryos also exhibit co-dominance.

7  
8 The co-dominant state of X rDNA loci in the progeny of Guam and Le Réduit parents did  
9 not change even when parental origin of ITS<sup>Δ24</sup> vs. ITS<sup>+</sup> rDNA loci was switched (i.e.  
10 Guam females crossed to Le Réduit males) (Figure S3B). It should be noted that in this  
11 direction of the cross, females exhibited hybrid dysgenesis, leading to a high frequency  
12 of degenerated ovaries (Figure S3A). Despite high rates of hybrid dysgenesis, all cells  
13 scored exhibited co-dominance (Figure S3B). These results establish that females  
14 exhibit co-dominance in a broad range of tissues and developmental stages, extending  
15 the previous findings in female neuroblasts (Greil and Ahmad 2012).

### 16 **Y rDNA can dominate in female cells.**

17 The above results reveal a striking difference in the state of nucleolar dominance  
18 between males and females: Y rDNA dominates over X rDNA in males, whereas two X  
19 chromosomes are co-dominant in females. What differences between the X and Y  
20 chromosome determine the decision of which rDNA locus is to be expressed? A  
21 previous study showed that nucleolar dominance in *D. melanogaster* is not likely due to  
22 imprinting during the parents' gametogenesis where the inheritance of the X and Y  
23 chromosomes is reversed (Greil and Ahmad 2012). Others have speculated that distinct  
24 sequence differences between the loci, in this case the X rDNA vs. Y rDNA loci, allow  
25 selective expression of particular rDNA loci (Kidd and Glover 1981, Macleod and Bird  
26 1982, Labhart and Reeder 1984, Grimaldi et al. 1990, Heix and Grummt 1995, Neves et  
27 al. 1995, Houchins et al. 1997, Caudy and Pikaard 2002, Felle et al. 2010). Yet another  
28 possibility is that chromosomal context, or location within a particular chromosome  
29 (Chandrasekhara et al. 2016, Mohannath et al. 2016) may determine whether or not a  
30 particular rDNA locus may be expressed/silenced. In addition, cellular sex might  
31 determine whether or not nucleolar dominance occurs.

32  
33  
34 Because parental imprinting unlikely contributes to the regulation of nucleolar  
35 dominance (Greil and Ahmad 2012), we sought to test the possibility that X and/or Y  
36 rDNA contain specific (*cis*) elements that determine the state of nucleolar dominance.  
37 To this end, we examined the state of nucleolar dominance in females that carry a Y  
38 chromosome. C(1)RM is a compound X chromosome (two X chromosomes are fused  
39 and it contains one rDNA locus) and C(1)RM/Y flies develop as females (Bridges 1916,  
40 Bridges 1921). The rDNA on C(1)RM was found to share all SNPs with the *yw* X rDNA  
41 (see Materials and Methods and the Reagent Table). Utilizing these SNPs, we  
42 determined the state of nucleolar dominance between C(1)RM rDNA and Y rDNA in  
43 female tissues (e.g. diploid larval tissues, the adult anterior midgut and adult ovary)  
44 (Figure 5A-C, 5E). Surprisingly, C(1)RM/Y females exhibited strikingly high frequency of  
45 Y rDNA dominance in many cell types (Figure 5A-C, 5E). This is a stark contrast to X/X  
46 females, where two X chromosomes exhibit co-dominance across tissues (Figure 5A-

1 C). These results indicate that Y rDNA dominance is determined by the Y chromosome  
2 (e.g. sequence information within Y rDNA or other elements on the Y chromosome),  
3 and disfavors the possibility that cellular sex determines dominance vs. co-dominance.  
4

5 Interestingly, adult female GSCs and cystoblasts showed a high degree of co-  
6 dominance in C(1)RM/Y females (Figure 5D, 5F), whereas some nurse cells showed Y  
7 rDNA dominance (Figure 5G). The somatic follicle cells of the egg chambers showed  
8 mostly co-dominance (Figure 5H). These data together suggest that, whereas the Y  
9 rDNA can dominate irrespective of cellular sex, it is not the sole factor to determine  
10 nucleolar dominance, and that cell-type specific information can modulate the state of  
11 nucleolar dominance.  
12

### 13 ***Y rDNA cis elements contribute to nucleolar dominance.***

14 The above data that the Y rDNA can dominate over the X rDNA irrespective of cellular  
15 sex in most cell types indicate that the Y chromosome may contain *cis*-acting  
16 element(s) that establish Y rDNA dominance. Such information may be embedded in  
17 the Y rDNA locus itself, such as variable sequences in the coding and/or spacer  
18 sequences (Tautz et al. 1987, Tautz et al. 1988, Schlotterer et al. 1994, Caudy and  
19 Pikaard 2002). Additionally, the entire chromosomal context may dictate the state of  
20 silencing/activation (Chandrasekhara et al. 2016, Mohannath et al. 2016). To address  
21 whether the Y rDNA contains *cis* information that influences its expression/dominance,  
22 we utilized an X chromosome that contains Y rDNA due to chromosomal  
23 rearrangements. In this chromosome, In(1)sc<sup>4L</sup>sc<sup>8R</sup>+Tp(1;YS)bb<sup>AM7</sup> (referred as to X<sup>bb-</sup>  
24 (Y<sup>bb+</sup>)), the original X rDNA locus was replaced with the rDNA locus from the Y  
25 chromosome (Figure 6A and Figure S4). We first sequenced the rDNA from this X<sup>bb-</sup>  
26 (Y<sup>bb+</sup>) chromosome and found that its rDNA shared 3/4 of the SNPs with the *yw* Y rDNA  
27 (see Materials and Methods and the Reagent Table). Using these three SNP *in situ*  
28 probes, we found that X<sup>bb-(Y<sup>bb+</sup>)</sup>/X females exhibit intermediate patterns of nucleolar  
29 dominance: in larval brain, imaginal discs, and adult anterior midgut enterocytes, X<sup>bb-</sup>  
30 (Y<sup>bb+</sup>) rDNA mostly dominates over X rDNA, as opposed to co-dominance in typical X/X  
31 females (Figure 6B-D, 6F, 6G, 6I-J). However, the degree of X<sup>bb-(Y<sup>bb+</sup>)</sup> rDNA dominance  
32 was lower than Y rDNA dominance in X/Y males (Figure 6B-C, 6J) and in C(1)RM/Y  
33 females (Figure 6D-E, 6G-H). GSCs from X<sup>bb-(Y<sup>bb+</sup>)</sup>/X females exhibited high rates of  
34 co-dominance, similar to X/X females (Figure 6K) as well as C(1)RM/Y females  
35 (compare to Figure 5D). These results suggest that Y rDNA carries critical information  
36 that allows for dominance of the Y rDNA locus. Additionally, the observation that the  
37 degree of Y rDNA dominance is much less than that in X/Y males or C(1)RM/Y females  
38 indicates that the chromosomal context (e.g. being embedded in the entire Y  
39 chromosome) also plays an important role in the determination of Y rDNA dominance.  
40

## 41 **Discussion**

42  
43 In this study, we conducted a thorough characterization of nucleolar dominance in *D.*  
44 *melanogaster*. Our study extends the previous discovery in *D. melanogaster* male larval  
45 neuroblasts that nucleolar dominance occurs within a species (Greil and Ahmad 2012)  
46 to a broader range of tissues and developmental stages. Our study shows that nucleolar

1 dominance is a developmentally regulated process, being established gradually during  
2 the course of development. This is reminiscent of what was seen in *Arabidopsis* (Pontes  
3 et al. 2007, Earley et al. 2010), and supports the notion that nucleolar dominance is not  
4 limited to interspecies hybrids.

5  
6 Earlier studies (Lawrence et al. 2004, Santoro and Grummt 2005, Earley et al. 2006,  
7 Earley et al. 2010, Greil and Ahmad 2012, Pontvianne et al. 2012), confirmed here,  
8 revealed heterochromatin formation as a critical aspect of nucleolar dominance.  
9 However, this likely reflects the need of heterochromatinization to silence rDNA loci that  
10 were chosen to be silenced, but does not provide the mechanism of 'choice' that  
11 dictates which particular rDNA loci are to be silenced or activated. Studies in  
12 interspecies hybrids of *Brassica* suggest that the 'choice' mechanism dictates which  
13 rDNA loci are silenced, instead of which loci are expressed (Chen and Pikaard 1997). In  
14 contrast, our results rather suggest that the Y rDNA locus has the information that  
15 allows it to be dominantly expressed. In experiments described in this study, where the  
16 Y rDNA was introduced into the context of females (C(1)RM/Y and X<sup>bb-</sup>(Y<sup>bb+</sup>)/X), the Y  
17 rDNA exhibited a high degree of dominance even in female cells, suggesting that the Y  
18 rDNA harbors certain information that promotes its transcription. However, our data  
19 (Figure 5 and Figure 6) also reveals that additional factor(s) on the Y chromosome, not  
20 just its rDNA locus, are important for complete establishment of Y rDNA dominance.  
21 Our results, compared to the studies in *Arabidopsis* (Chen and Pikaard 1997), suggest  
22 that the 'choice' mechanism may vary across species.

23  
24 Elements within rDNA have been shown to influence nucleolar dominance in  
25 interspecies hybrids, particularly the non-coding region of rDNA: the length of the  
26 intergenic spacer sequence (IGS), which contains rDNA promoters (Coen and Dover  
27 1982), was shown to dictate dominance in interspecies *Xenopus* hybrids (Reeder et al.  
28 1983). Because the IGS sequences are known to be highly diverged compared to the  
29 coding region of rDNA (Tautz et al. 1987, Tautz et al. 1988), it is tempting to speculate  
30 that differences in IGS sequences between X and Y rDNA loci dictate Y rDNA  
31 dominance. Indeed, differential activity of X rDNA IGS vs. Y rDNA IGS as  
32 promoter/enhancer for RNA polymerase I, suggested in a previous study (Labhart and  
33 Reeder 1984), may be an underlying mechanism for nucleolar dominance.

34  
35 In summary, our work expands on previous studies in *Arabidopsis* and *Drosophila* and  
36 supports the notion that nucleolar dominance is not constrained to interspecies hybrids,  
37 and represents a mechanism of rRNA regulation within a species. Our study suggests  
38 that the Y rDNA may have *cis* elements that dictate Y rDNA's dominance in *D.*  
39 *melanogaster*. The precise identity of the *cis* element(s) of the Y rDNA/Y chromosome,  
40 and how they mediate its preferential transcription await future investigation. Our study  
41 lays the foundation to identify *cis* elements that regulate nucleolar dominance and to  
42 understand the underlying mechanisms needed to achieve nucleolar dominance. Most  
43 importantly, why a locus-wide mechanism, i.e. nucleolar dominance, has evolved to  
44 regulate rDNA expression is a fundamental question to be addressed in the future.

## 45 46 **Acknowledgements**

1  
2 We thank Dr. Amanda Larracuente, Bloomington *Drosophila* Stock Center, Kyoto  
3 *Drosophila* Stock Center, and the UC San Diego *Drosophila* Stock Center for reagents.  
4 We thank the Yamashita lab members and Dr. Sue Hammoud for discussion and/or  
5 comments on this manuscript. This research was supported by Howard Hughes Medical  
6 Institute (to Y.Y) and in part by the NIH Career Training in Reproductive Biology  
7 (5T32HD079342-04) (to N.W-P).

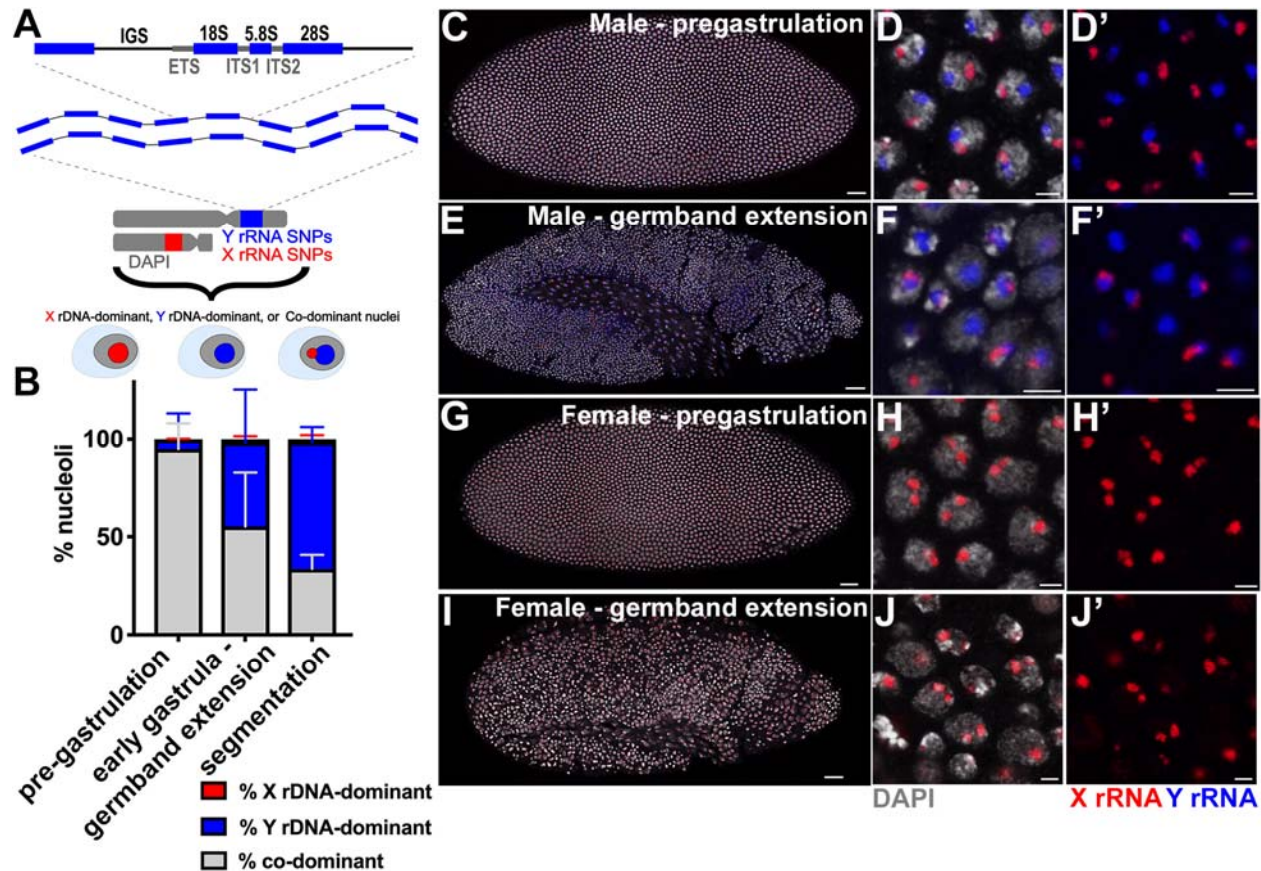

1  
2 **Figure 1: Nucleolar dominance is not established during embryogenesis in male**  
3 **embryos.** A) Schematic of rDNA repeats (IGS = intergenic spacer, ETS = external  
4 transcribed spacer, ITS = internal transcribed spacer, 18S, 5.8S and 28S = rRNA  
5 coding region). X and Y rDNA can be distinguished by SNP *in situ* hybridization.  
6 Definition of X rDNA-dominant, Y rDNA-dominant, or co-dominant is shown. B)   
7 Quantification of nucleolar dominance across embryogenesis in males: pre-gastrulation  
8 (n = 748 cells from 7 embryos), early gastrula through germband extension (n = 1086  
9 cells from 12 embryos), and segmentation (n = 1242 cells from 10 embryos). Red = % X  
10 rDNA-dominant, blue = % Y rDNA-dominant, grey = % co-dominant. C) Male pre-  
11 gastrulation embryo, scale = 25 $\mu$ m, D) zoomed image of nuclei from male pre-  
12 gastrulation embryo, scale = 3 $\mu$ m. E) Male embryo at germband extension stage, scale  
13 = 25 $\mu$ m, F) zoomed image of male embryo at germband extension stage, scale = 3 $\mu$ m.  
14 G) Female pre-gastrulation embryo, scale = 25 $\mu$ m, H) zoomed image of female pre-  
15 gastrulation embryo, scale = 3 $\mu$ m. I) Female embryo at germband extension stage,  
16 scale = 25 $\mu$ m, J) zoomed image of female embryo at germband extension stage, scale  
17 = 3 $\mu$ m. Red = X rRNA, blue Y rRNA, white = DAPI.

18

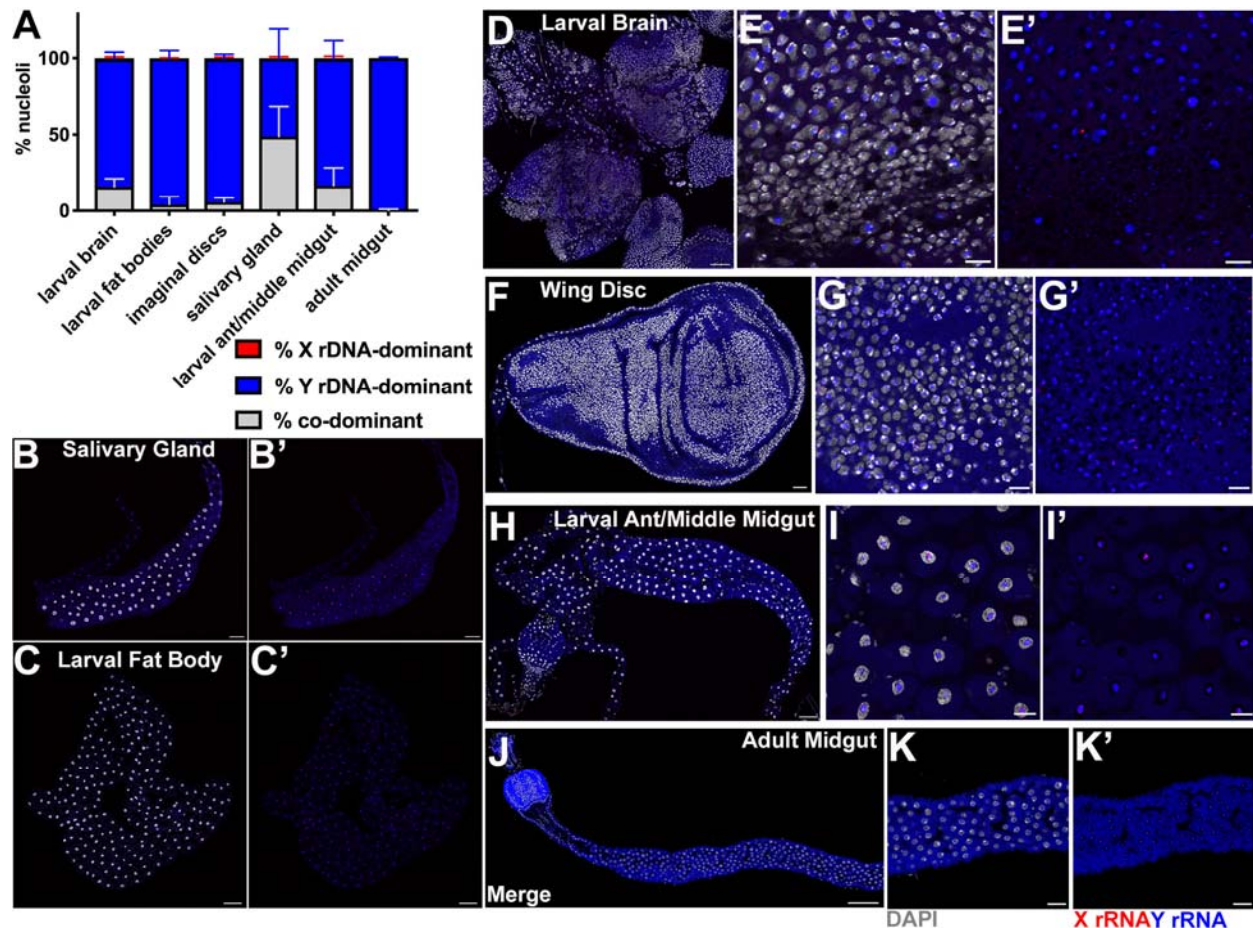

1  
2 **Figure 2: Y rDNA dominance is established during development in males.** A) Quantification of nucleolar dominance in larval and adult tissue(s) in males: larval brain (n = 1594 cells from 6 brains), larval fat bodies (n = 1575 cells from 17 fat bodies),  
3  
4  
5  
6  
7  
8  
9  
10  
11  
12  
13  
14  
15  
16  
17  
18  
19  
20  
21  
22  
23  
24  
25  
26  
27  
28  
29  
30  
31  
32  
33  
34  
35  
36  
37  
38  
39  
40  
41  
42  
43  
44  
45  
46  
47  
48  
49  
50  
51  
52  
53  
54  
55  
56  
57  
58  
59  
60  
61  
62  
63  
64  
65  
66  
67  
68  
69  
70  
71  
72  
73  
74  
75  
76  
77  
78  
79  
80  
81  
82  
83  
84  
85  
86  
87  
88  
89  
90  
91  
92  
93  
94  
95  
96  
97  
98  
99  
100  
101  
102  
103  
104  
105  
106  
107  
108  
109  
110  
111  
112  
113  
114  
115  
116  
117  
118  
119  
120  
121  
122  
123  
124  
125  
126  
127  
128  
129  
130  
131  
132  
133  
134  
135  
136  
137  
138  
139  
140  
141  
142  
143  
144  
145  
146  
147  
148  
149  
150  
151  
152  
153  
154  
155  
156  
157  
158  
159  
160  
161  
162  
163  
164  
165  
166  
167  
168  
169  
170  
171  
172  
173  
174  
175  
176  
177  
178  
179  
180  
181  
182  
183  
184  
185  
186  
187  
188  
189  
190  
191  
192  
193  
194  
195  
196  
197  
198  
199  
200  
201  
202  
203  
204  
205  
206  
207  
208  
209  
210  
211  
212  
213  
214  
215  
216  
217  
218  
219  
220  
221  
222  
223  
224  
225  
226  
227  
228  
229  
230  
231  
232  
233  
234  
235  
236  
237  
238  
239  
240  
241  
242  
243  
244  
245  
246  
247  
248  
249  
250  
251  
252  
253  
254  
255  
256  
257  
258  
259  
260  
261  
262  
263  
264  
265  
266  
267  
268  
269  
270  
271  
272  
273  
274  
275  
276  
277  
278  
279  
280  
281  
282  
283  
284  
285  
286  
287  
288  
289  
290  
291  
292  
293  
294  
295  
296  
297  
298  
299  
300  
301  
302  
303  
304  
305  
306  
307  
308  
309  
310  
311  
312  
313  
314  
315  
316  
317  
318  
319  
320  
321  
322  
323  
324  
325  
326  
327  
328  
329  
330  
331  
332  
333  
334  
335  
336  
337  
338  
339  
340  
341  
342  
343  
344  
345  
346  
347  
348  
349  
350  
351  
352  
353  
354  
355  
356  
357  
358  
359  
360  
361  
362  
363  
364  
365  
366  
367  
368  
369  
370  
371  
372  
373  
374  
375  
376  
377  
378  
379  
380  
381  
382  
383  
384  
385  
386  
387  
388  
389  
390  
391  
392  
393  
394  
395  
396  
397  
398  
399  
400  
401  
402  
403  
404  
405  
406  
407  
408  
409  
410  
411  
412  
413  
414  
415  
416  
417  
418  
419  
420  
421  
422  
423  
424  
425  
426  
427  
428  
429  
430  
431  
432  
433  
434  
435  
436  
437  
438  
439  
440  
441  
442  
443  
444  
445  
446  
447  
448  
449  
450  
451  
452  
453  
454  
455  
456  
457  
458  
459  
460  
461  
462  
463  
464  
465  
466  
467  
468  
469  
470  
471  
472  
473  
474  
475  
476  
477  
478  
479  
480  
481  
482  
483  
484  
485  
486  
487  
488  
489  
490  
491  
492  
493  
494  
495  
496  
497  
498  
499  
500  
501  
502  
503  
504  
505  
506  
507  
508  
509  
510  
511  
512  
513  
514  
515  
516  
517  
518  
519  
520  
521  
522  
523  
524  
525  
526  
527  
528  
529  
530  
531  
532  
533  
534  
535  
536  
537  
538  
539  
540  
541  
542  
543  
544  
545  
546  
547  
548  
549  
550  
551  
552  
553  
554  
555  
556  
557  
558  
559  
560  
561  
562  
563  
564  
565  
566  
567  
568  
569  
570  
571  
572  
573  
574  
575  
576  
577  
578  
579  
580  
581  
582  
583  
584  
585  
586  
587  
588  
589  
590  
591  
592  
593  
594  
595  
596  
597  
598  
599  
600  
601  
602  
603  
604  
605  
606  
607  
608  
609  
610  
611  
612  
613  
614  
615  
616  
617  
618  
619  
620  
621  
622  
623  
624  
625  
626  
627  
628  
629  
630  
631  
632  
633  
634  
635  
636  
637  
638  
639  
640  
641  
642  
643  
644  
645  
646  
647  
648  
649  
650  
651  
652  
653  
654  
655  
656  
657  
658  
659  
660  
661  
662  
663  
664  
665  
666  
667  
668  
669  
670  
671  
672  
673  
674  
675  
676  
677  
678  
679  
680  
681  
682  
683  
684  
685  
686  
687  
688  
689  
690  
691  
692  
693  
694  
695  
696  
697  
698  
699  
700  
701  
702  
703  
704  
705  
706  
707  
708  
709  
710  
711  
712  
713  
714  
715  
716  
717  
718  
719  
720  
721  
722  
723  
724  
725  
726  
727  
728  
729  
730  
731  
732  
733  
734  
735  
736  
737  
738  
739  
740  
741  
742  
743  
744  
745  
746  
747  
748  
749  
750  
751  
752  
753  
754  
755  
756  
757  
758  
759  
760  
761  
762  
763  
764  
765  
766  
767  
768  
769  
770  
771  
772  
773  
774  
775  
776  
777  
778  
779  
780  
781  
782  
783  
784  
785  
786  
787  
788  
789  
790  
791  
792  
793  
794  
795  
796  
797  
798  
799  
800  
801  
802  
803  
804  
805  
806  
807  
808  
809  
810  
811  
812  
813  
814  
815  
816  
817  
818  
819  
820  
821  
822  
823  
824  
825  
826  
827  
828  
829  
830  
831  
832  
833  
834  
835  
836  
837  
838  
839  
840  
841  
842  
843  
844  
845  
846  
847  
848  
849  
850  
851  
852  
853  
854  
855  
856  
857  
858  
859  
860  
861  
862  
863  
864  
865  
866  
867  
868  
869  
870  
871  
872  
873  
874  
875  
876  
877  
878  
879  
880  
881  
882  
883  
884  
885  
886  
887  
888  
889  
890  
891  
892  
893  
894  
895  
896  
897  
898  
899  
900  
901  
902  
903  
904  
905  
906  
907  
908  
909  
910  
911  
912  
913  
914  
915  
916  
917  
918  
919  
920  
921  
922  
923  
924  
925  
926  
927  
928  
929  
930  
931  
932  
933  
934  
935  
936  
937  
938  
939  
940  
941  
942  
943  
944  
945  
946  
947  
948  
949  
950  
951  
952  
953  
954  
955  
956  
957  
958  
959  
960  
961  
962  
963  
964  
965  
966  
967  
968  
969  
970  
971  
972  
973  
974  
975  
976  
977  
978  
979  
980  
981  
982  
983  
984  
985  
986  
987  
988  
989  
990  
991  
992  
993  
994  
995  
996  
997  
998  
999  
1000



1

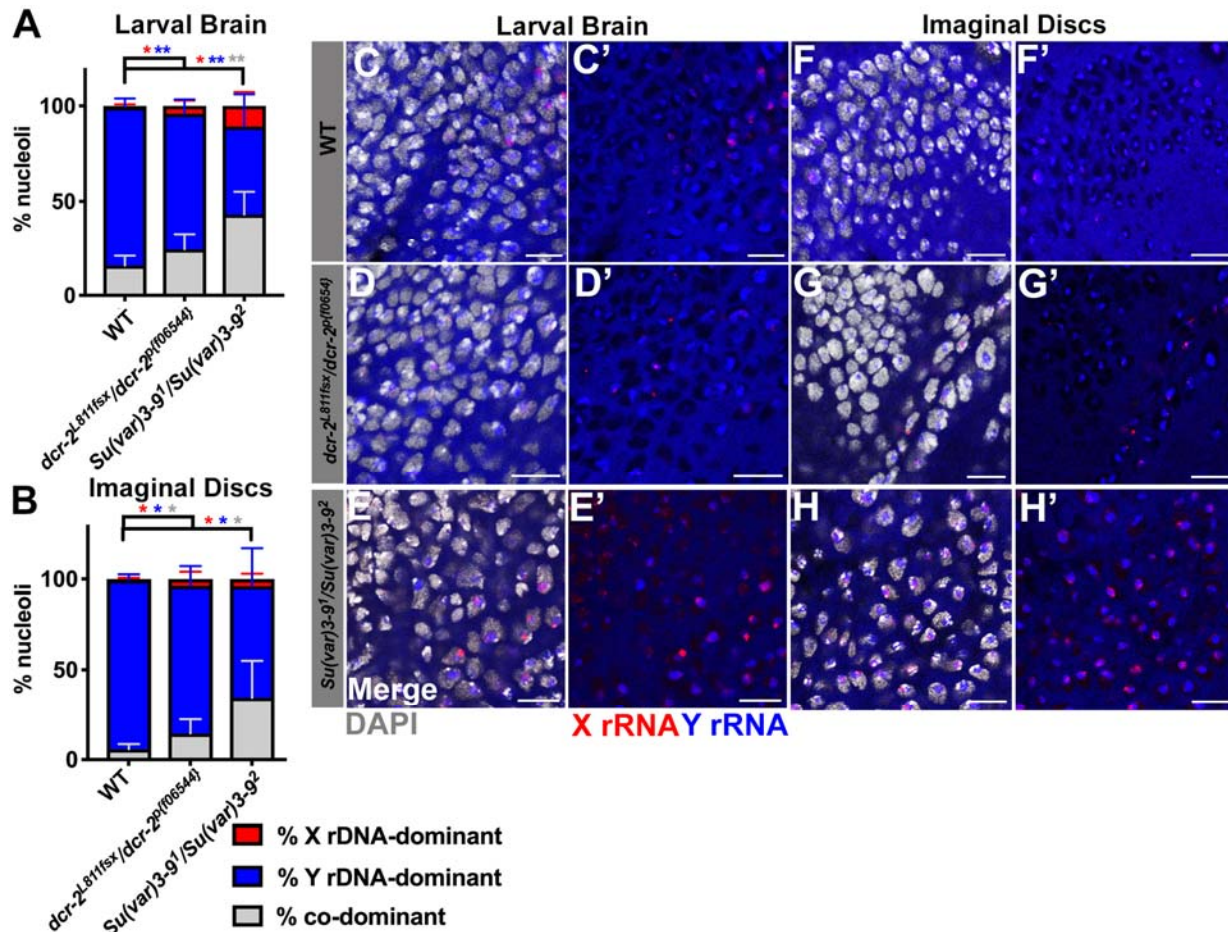

2

3

4

5

6

7

8

9

10

11

12

13

14

15

16

17

18

19

20

21

22

**Figure 3: Heterochromatin formation aids in Y rDNA dominance in males.** Quantification of male nucleolar dominance in A) larval brains of wild type (*yw*) (n = 1594 cells from 6 brains), *dcr-2<sup>L811fsx/dcr-2<sup>p[06544]</sup></sup>* mutants (n = 504 cells from 6 brains), and *Su(var)3-9<sup>1</sup>/Su(var)3-9<sup>2</sup>* mutants (n = 461 cells from 6 brains) (the same wild type data from Figure 2 for comparison). B) Quantification of nucleolar dominance in male imaginal discs of wild type (n = 1251 cells from 5 imaginal discs), *dcr-2<sup>L811fsx/dcr-2<sup>p[06544]</sup></sup>* mutants (n = 579 cells from 9 imaginal discs), and *Su(var)3-9<sup>1</sup>/Su(var)3-9<sup>2</sup>* mutants (n = 432 cells from 6 imaginal discs) (the same wild type data from Figure 2 for comparison). Red = % X rDNA-dominant, blue = % Y rDNA-dominant, grey = % co-dominant nuclei. p-values calculated using Welch's unpaired, unequal variances *t*-test using n = number of tissues. (no star) = not significant, \* = < 0.05, \*\* = < 0.01. Colors of asterisks correspond to colors of bars for which P-values were calculated (e.g. blue asterisk for Y rDNA-dominant p-values). Representative images of larval brains from C) wild type (*yw*), D) *dcr-2<sup>L811fsx/dcr-2<sup>p[06544]</sup></sup>* mutants, and E) *Su(var)3-9<sup>1</sup>/Su(var)3-9<sup>2</sup>* mutants. Representative images of imaginal discs from F) wild type, G) *dcr-2<sup>L811fsx/dcr-2<sup>p[06544]</sup></sup>* mutants, and H) *Su(var)3-9<sup>1</sup>/Su(var)3-9<sup>2</sup>* mutants. Red = X rRNA, blue Y rRNA, white = DAPI. All scale bars = 10µm.

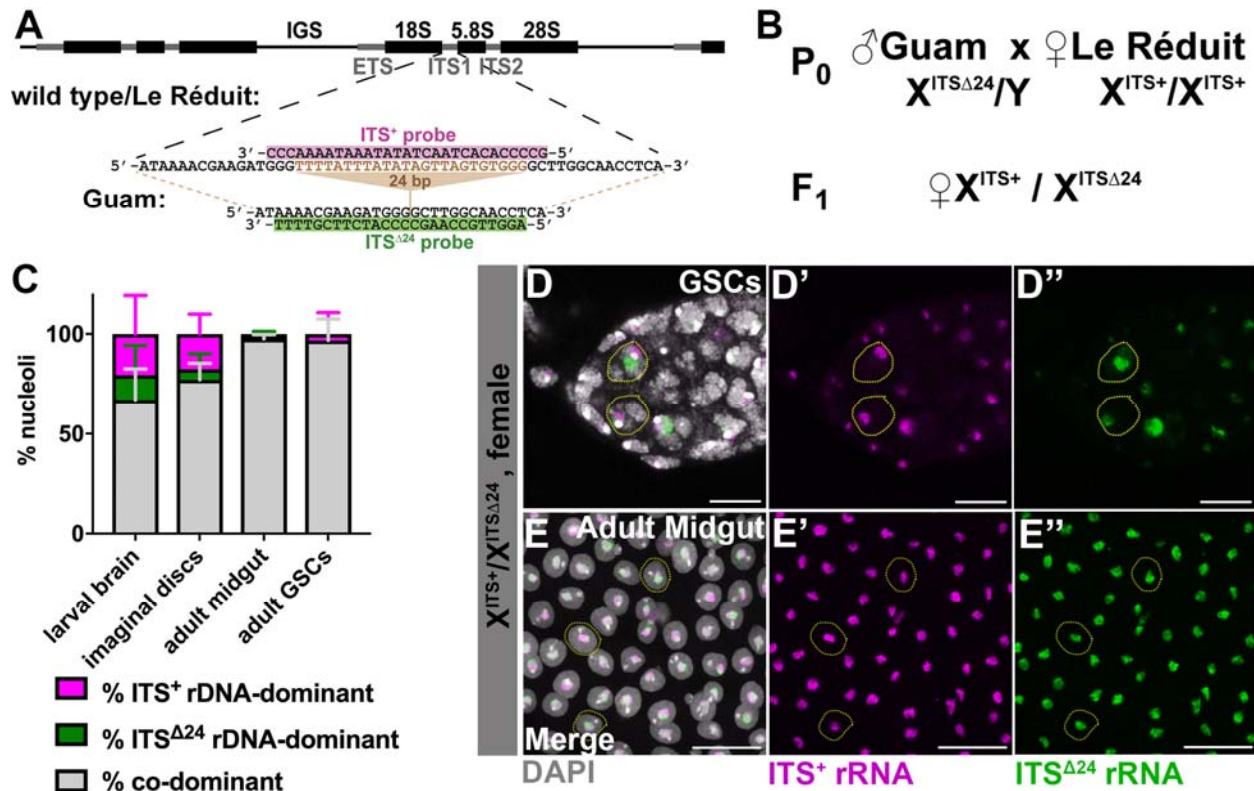

1  
2 **Figure 4: X/X females express both rDNA loci throughout development.** A)  
3 Oligonucleotide probe design to differentially visualize two distinct X-chromosome rDNA  
4 internal transcribed spacer (ITS) transcripts, utilizing a 24-bp deletion in the rDNA ITS  
5 between wild type/ Le Réduit and Guam *D. melanogaster* strains. B) The cross to  
6 generate female F<sub>1</sub> with one X chromosome with wild type ITS (ITS<sup>+</sup>) and the other X  
7 chromosome with the ITS with 24bp deletion (ITS<sup>Δ24</sup>). C) Quantification of nucleolar  
8 dominance between two X rDNA in female larval and adult tissue(s): larval brain (n =  
9 2616 cells from 9 brains), imaginal discs (n = 2575 cells from 9 imaginal discs), adult  
10 anterior midgut (n = 904 cells from 9 guts), adult GSCs (n = 150 cells from 57  
11 germarium). Magenta = % ITS<sup>+</sup> rDNA-dominant, green = % ITS<sup>Δ24</sup> rDNA-dominant, grey  
12 = % co-dominant nuclei. Representative images of D-D'') GSCs, scale = 8μm, and E-  
13 E'') adult anterior midgut enterocytes, scale = 25μm. Magenta = ITS<sup>+</sup> rRNA, green =  
14 ITS<sup>Δ24</sup> rRNA, white = DAPI.

15  
16

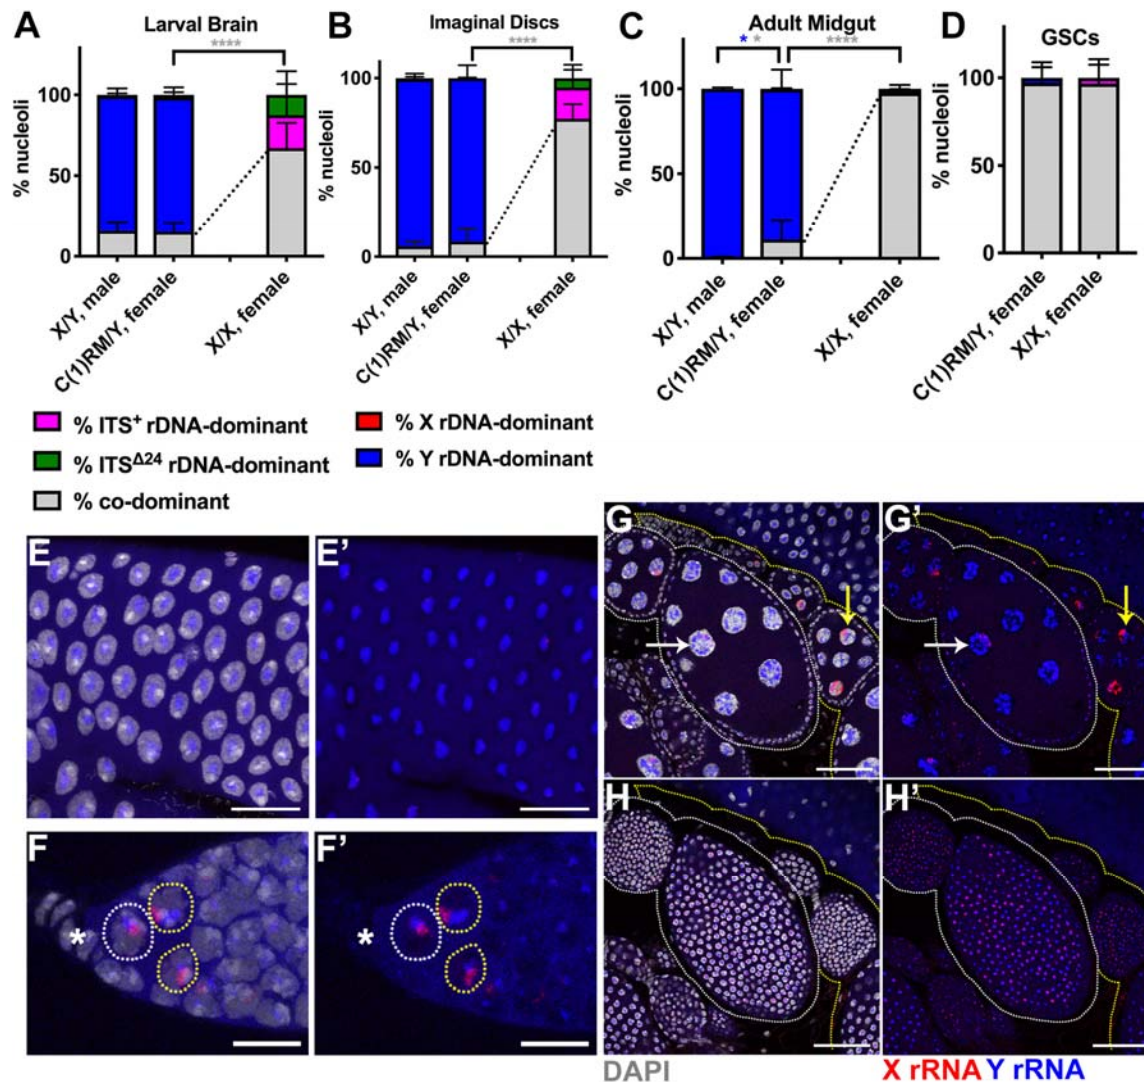

1  
2 **Figure 5: The Y rDNA can dominate over X rDNA in female cells.** A-D)  
3 Quantification of nucleolar dominance in C(1)RM/Y females compared to males (data  
4 from Figure 2 for comparison) and typical X/X females (data from Figure 4 for  
5 comparison) in larval brain (A, n = 914 cells from 9 brains), imaginal discs (B, n = 1068  
6 cells from 12 imaginal discs), adult anterior midgut enterocytes (C, n = 870 cells from 7  
7 guts), and female GSCs (D, n = 54 cells from 21 germarium). Dotted lines denote  
8 differences in rates of co-dominance between C(1)RM/Y and typical X/X females. p-  
9 values calculated using Welch's unpaired, unequal variances *t*-test using number of  
10 tissues scored. p-values between C(1)RM/Y and XX females were only calculated for %  
11 co-dominant. (no star) = not significant, \* = < 0.05, \*\*\*\* = < 0.0001. Colors of asterisks  
12 correspond to colors of bars for which P-values were calculated (e.g. blue asterisk for Y  
13 rDNA-dominant p-values). **E**) Representative image of C(1)RM/Y female adult anterior  
14 midgut enterocytes, scale = 25μm. **F**) C(1)RM/Y female GSCs (white circle) and  
15 cystoblasts (yellow circles), \* = terminal filament, scale = 10μm. **G**) two C(1)RM/Y  
16 ovarioles (separately circled in white or yellow), scale = 50μm. Arrows indicating nurse  
17 cells with low X rDNA expression (white) and high X rDNA expression (yellow). **H**)

1 Follicle cells from C(1)RM/Y ovarioles corresponding to G (different Z-depth), scale =  
 2 50 $\mu$ m. Red = X rRNA, blue Y rRNA, white = DAPI.

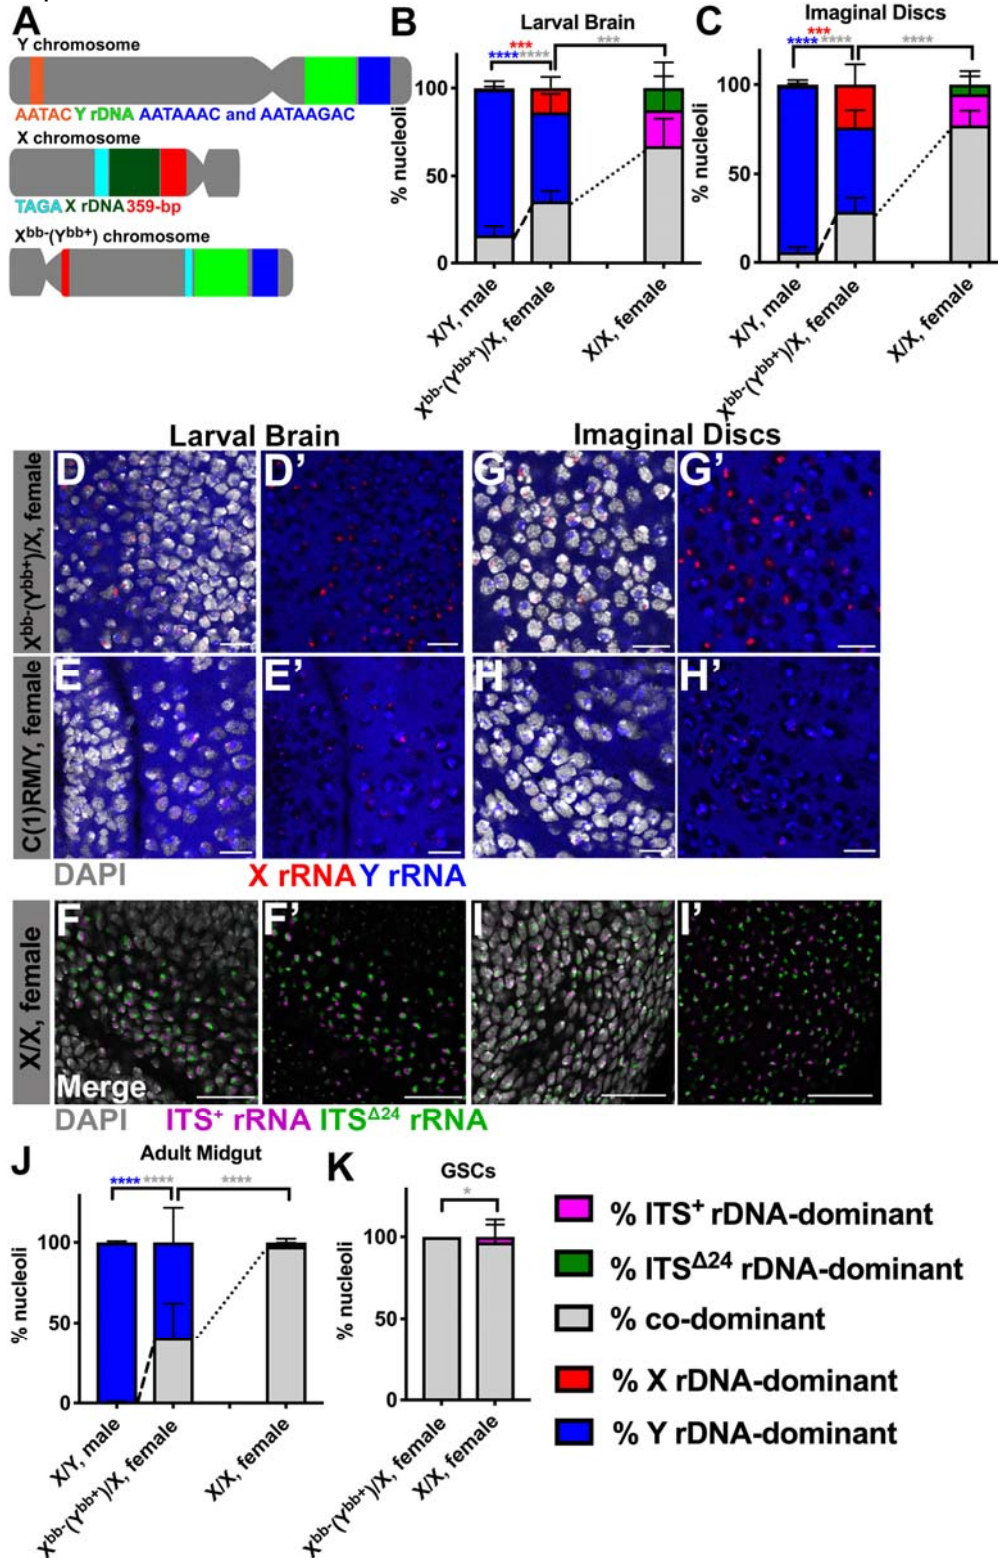

3  
 4 **Figure 6: Y rDNA likely has *cis* information to dictate nucleolar dominance. A)**  
 5 Structure of a wild type Y chromosome, a wild type X chromosome, and the  $X^{bb-}(Y^{bb+})$

1 chromosome based on [Figure S4](#). Constriction represents centromere location. B-C)  
2 Quantification of nucleolar dominance in  $X^{bb-}(Y^{bb+})/X$  females compared to X/Y males  
3 (data from [Figure 2](#) for comparison) and X/X females (data from [Figure 4](#) for  
4 comparison) in larval brain (B,  $n = 1400$  cells from 8 brains) and imaginal discs (C,  $n =$   
5  $1362$  cells from 9 imaginal discs). Red = % X rDNA-dominant, blue = % Y rDNA-  
6 dominant, grey = % co-dominant, magenta = % ITS<sup>+</sup> rDNA-dominant, green = % ITS <sup>$\Delta 24$</sup>   
7 rDNA-dominant nuclei. p-values calculated using Welch's unpaired, unequal variances  
8 *t*-test using  $n =$  number of tissues. p-values between  $X^{bb-}(Y^{bb+})/X$  and XX females were  
9 only calculated for % co-dominance. Dotted lines denote differences in rates of co-  
10 dominance between  $X^{bb-}(Y^{bb+})/X$  and X/X females. Dashed lines denote differences in  
11 rates of co-dominance between  $X^{bb-}(Y^{bb+})/X$  females and X/Y males. \*\*\* =  $< 0.001$ , \*\*\*\*  
12 =  $< 0.0001$ . Colors of asterisks correspond to colors of bars for which P-values were  
13 calculated (e.g. blue asterisk for Y rDNA-dominant p-values). Representative images of  
14 larval brain from D)  $X^{bb-}(Y^{bb+})/X$  females, scale =  $10\mu\text{m}$ , E) C(1)RM/Y females, scale =  
15  $10\mu\text{m}$ , and F) X/X females, scale =  $25\mu\text{m}$ . Representative images of imaginal discs from  
16 F)  $X^{bb-}(Y^{bb+})/X$  females, scale =  $8\mu\text{m}$ , H) C(1)RM/Y females, scale =  $10\mu\text{m}$ , I) X/X  
17 females, scale =  $25\mu\text{m}$ . Red = X rRNA, blue Y rRNA, white = DAPI, magenta = ITS<sup>+</sup>  
18 rDNA transcript, green = ITS <sup>$\Delta 24$</sup>  rDNA transcript. J) Quantification of nucleolar  
19 dominance in  $X^{bb-}(Y^{bb+})/X$  females compared to both X/Y males (data from [Figure 2](#) for  
20 comparison) and X/X females (data from [Figure 4](#) for comparison) in adult anterior  
21 midgut enterocytes ( $n = 1213$  cells from 13 guts), and K) female GSCs ( $n = 122$  cells  
22 from 51 germarium). Red = % X rDNA-dominant, blue = % Y rDNA-dominant, grey = %  
23 co-dominant, magenta = % ITS<sup>+</sup> rDNA-dominant, green = % ITS <sup>$\Delta 24$</sup>  rDNA-dominant  
24 nuclei. p-values calculated using Welch's unpaired, unequal variances *t*-test. p-values  
25 between  $X^{bb-}(Y^{bb+})/X$  and XX females were only calculated for % co-dominance. Dotted  
26 lines denote differences in rates of co-dominance between  $X^{bb-}(Y^{bb+})/X$  and X/X  
27 females. Dashed lines denote differences in rates of co-dominance between  $X^{bb-}(Y^{bb+})/X$   
28 females and X/Y males. (no star) = not significant, \* =  $< 0.05$ , \*\*\*\* =  $< 0.0001$ .  
29

1 **Supplementary Figures**

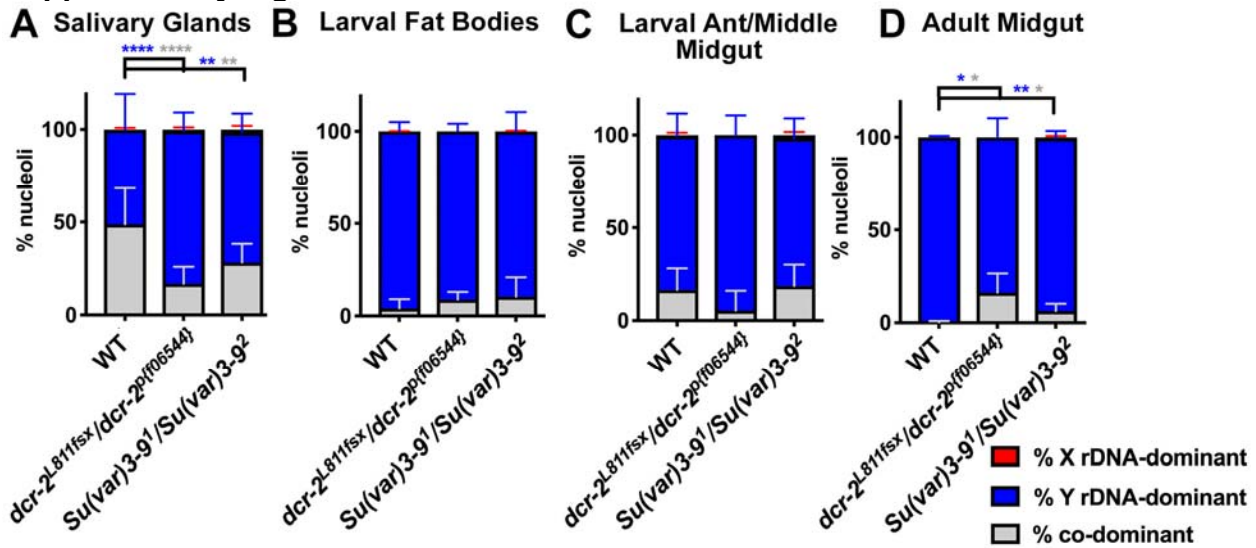

2  
3 **Figure S1: The state of nucleolar dominance in polyploid tissues in *dcr-2* and**  
4 ***Su(var)3-9* mutants.** Quantification of nucleolar dominance in males in A) salivary  
5 glands of wild type (*yw*) (n = 878 cells from 15 salivary glands), *dcr-2<sup>L811fsx/dcr-2<sup>p[f06544]</sup></sup>*  
6 mutants (n = 373 cells from 8 salivary glands), and *Su(var)3-9<sup>1</sup>/Su(var)3-9<sup>2</sup>*  
7 mutants (n = 423 cells from 11 salivary glands), B) larval fat bodies of wild type (n =  
8 1575 cells from 17 fat bodies), *dcr-2<sup>L811fsx/dcr-2<sup>p[f06544]</sup></sup>* mutants (n = 320 cells from 4 fat  
9 bodies), and *Su(var)3-9<sup>1</sup>/Su(var)3-9<sup>2</sup>* mutants (n = 351 cells from 7 fat bodies), C) larval  
10 anterior midgut enterocytes of wild type (n = 181 cells from 6 guts), *dcr-2<sup>L811fsx/dcr-2<sup>p[f06544]</sup></sup>*  
11 mutants (n = 150 cells from 5 guts), and *Su(var)3-9<sup>1</sup>/Su(var)3-9<sup>2</sup>* mutants (n =  
12 172 cells from 5 guts), and D) adult anterior midgut enterocytes of wild type (n = 922  
13 cells from 7 guts), *dcr-2<sup>L811fsx/dcr-2<sup>p[f06544]</sup></sup>* mutants (n = 614 cells from 6 guts), and  
14 *Su(var)3-9<sup>1</sup>/Su(var)3-9<sup>2</sup>* mutants (n = 476 cells from 6 guts). Red = % X rDNA-dominant,  
15 blue = % Y rDNA-dominant, grey = % co-dominant nuclei. p-values calculated using  
16 Welch's unpaired, unequal variances *t*-test using n = number of tissues. (no star) = not  
17 significant, \* = < 0.05, \*\* = < 0.01, \*\*\*\* = < 0.0001. Colors of asterisks correspond to  
18 colors of bars for which p-values were calculated (e.g. blue asterisk for Y rDNA-  
19 dominant p-values).

20  
21

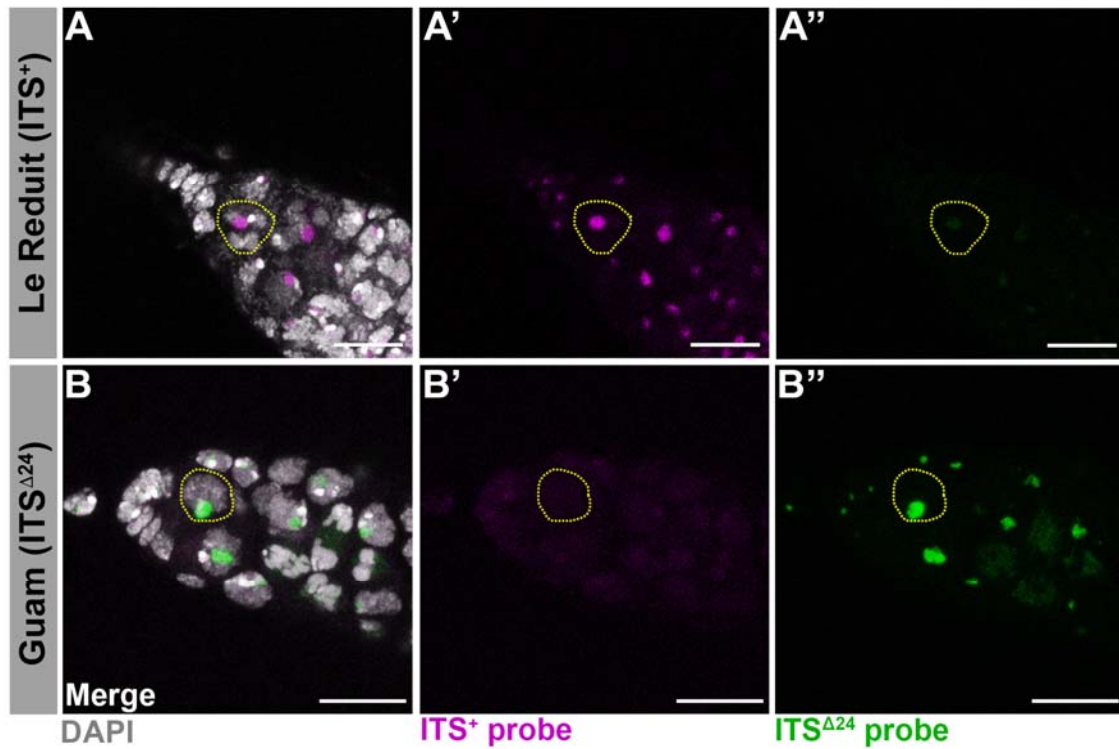

1  
2 **Figure S2: ITS probes that differentially identify distinct X rDNA variants.** A)  
3 Representative images of germarium from Le Réduit, and B) Guam *D. melanogaster*  
4 strains. All scales = 10 $\mu$ m. Magenta = ITS<sup>+</sup> rDNA transcript, green = ITS <sup>$\Delta$ 24</sup> rDNA  
5 transcript, white = DAPI.  
6  
7

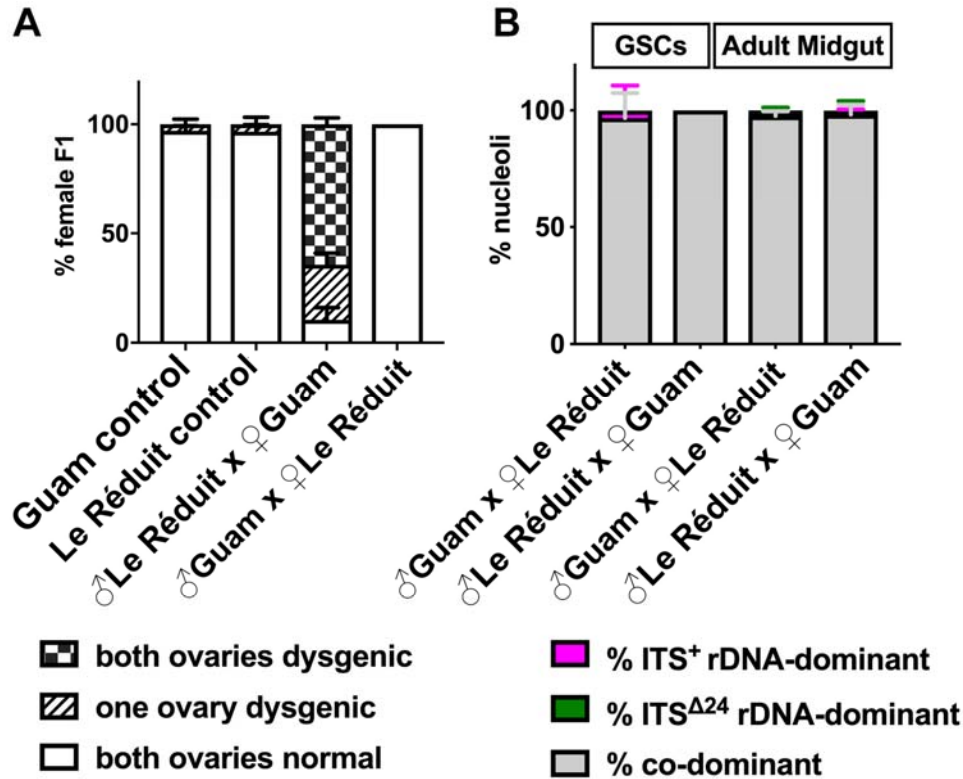

1  
2  
3 **Figure S3: Two X chromosomes (ITS<sup>+</sup> vs. ITS<sup>Δ24</sup> variants) exhibit co-dominance**  
4 **irrespective of parental origins.** A) Quantification of hybrid dysgenesis in the crosses  
5 of ♂ Guam x ♀ Guam controls (n = 104 females from 4 vials), ♂ Le Réduit x ♀ Le  
6 Réduit controls (n = 185 females from 4 vials), and ♂ Le Réduit x ♀ Guam (n = 145  
7 females from 3 vials), and ♂ Guam x ♀ Le Réduit (n = 202 females from 4 vials)  
8 performed at 25°C (Engels and Preston 1979). B) Quantification of female nucleolar  
9 dominance between two X rDNA comparing both cross directions (data from Figure 4 is  
10 reproduced to show that the parental origin minimally influence the state of nucleolar  
11 dominance). GSCs scored: ♂ Guam x ♀ Le Réduit (n = 150 cells from 57 germarium),  
12 ♂ Le Réduit x ♀ Guam (n = 107 cells from 51 germarium). Adult anterior midgut scored:  
13 ♂ Guam x ♀ Le Réduit (n = 904 cells from 9 guts), ♂ Le Réduit x ♀ Guam (n = 962 cells  
14 from 9 guts).  
15  
16  
17  
18  
19



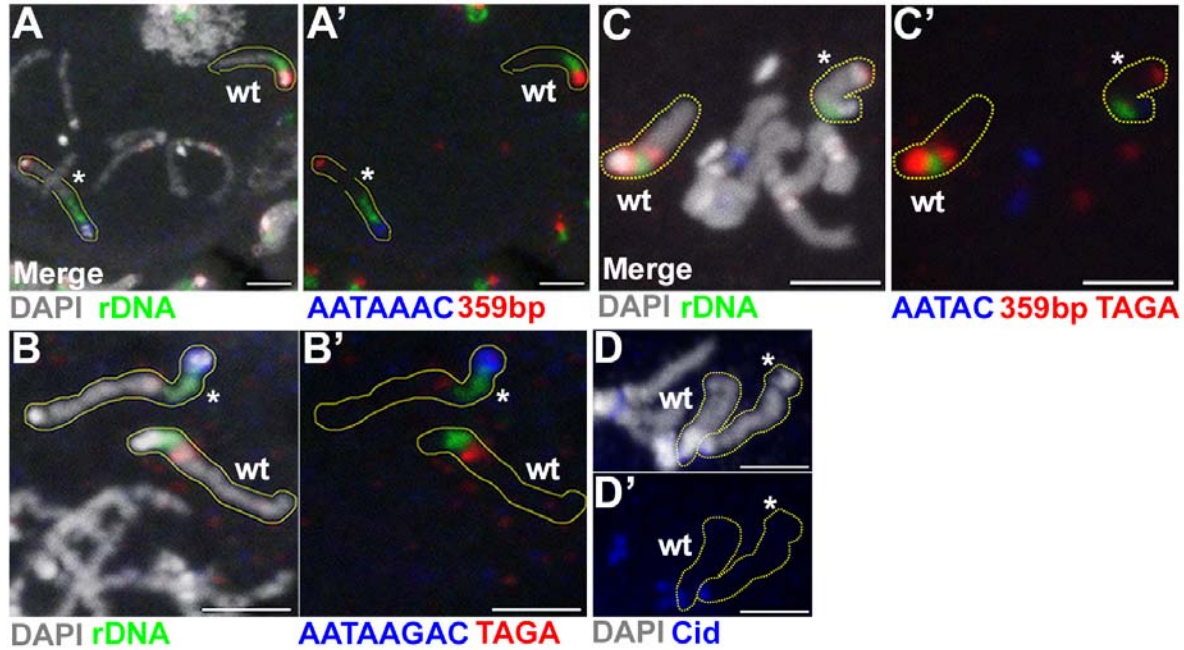

1  
2 **Figure S4: Cytological characterization of the  $X^{bb-}(Y^{bb+})$  chromosome.**  
3 DNA fluorescent *in situ* hybridization (FISH) on mitotic chromosome spreads from larval  
4 brains of  $X^{bb-}(Y^{bb+})/X$  females with A) AATAAAC (blue) and 359-bp (red). B)  
5 AATAAGAC (blue) and TAGA (red). C) AATAC (blue), TAGA, and 359-bp. D)  
6 Immunofluorescence (IF) of centromeric protein Cid (blue) on mitotic chromosome  
7 spreads.  $X^{bb-}(Y^{bb+})$  (\*) and wild type X (wt), both outlined in yellow. White = DAPI. All  
8 scale bars = 3  $\mu$ m.  
9

## References

- 1 Aldrich, J. C. and K. A. Maggert (2015). "Transgenerational inheritance of diet-induced genome
- 2 rearrangements in *Drosophila*." *PLoS Genet* **11**(4): e1005148.
- 3 Blum, J. A., S. Bonaccorsi, M. Marzullo, V. Palumbo, Y. M. Yamashita, D. A. Barbash and M. Gatti
- 4 (2017). "The Hybrid Incompatibility Genes *Lhr* and *Hmr* Are Required for Sister Chromatid
- 5 Detachment During Anaphase but Not for Centromere Function." *Genetics* **207**(4): 1457-1472.
- 6 Bridges, C. B. (1916). "Non-Disjunction as Proof of the Chromosome Theory of Heredity."
- 7 *Genetics* **1**(1): 1-52.
- 8 Bridges, C. B. (1921). "TRIPLOID INTERSEXES IN *DROSOPHILA MELANOGASTER*." *Science*
- 9 **54**(1394): 252-254.
- 10 Busch, H., Y. Daskal, F. Gyorkey and K. Smetana (1979). "Silver staining of nucleolar granules in
- 11 tumor cells." *Cancer Res* **39**(3): 857-863.
- 12 Cassidy, D. M. and A. W. Blackler (1974). "Repression of nucleolar organizer activity in an
- 13 interspecific hybrid of the genus *Xenopus*." *Dev Biol* **41**(1): 84-96.
- 14 Caudy, A. A. and C. S. Pikaard (2002). "Xenopus ribosomal RNA gene intergenic spacer elements
- 15 conferring transcriptional enhancement and nucleolar dominance-like competition in oocytes."
- 16 *J Biol Chem* **277**(35): 31577-31584.
- 17 Chandrasekhara, C., G. Mohannath, T. Blevins, F. Pontvianne and C. S. Pikaard (2016).
- 18 "Chromosome-specific NOR inactivation explains selective rRNA gene silencing and dosage
- 19 control in *Arabidopsis*." *Genes Dev* **30**(2): 177-190.
- 20 Chen, Z. J., L. Comai and C. S. Pikaard (1998). "Gene dosage and stochastic effects determine
- 21 the severity and direction of uniparental ribosomal RNA gene silencing (nucleolar dominance) in
- 22 *Arabidopsis* allopolyploids." *Proc Natl Acad Sci U S A* **95**(25): 14891-14896.
- 23 Chen, Z. J. and C. S. Pikaard (1997). "Transcriptional analysis of nucleolar dominance in
- 24 polyploid plants: biased expression/silencing of progenitor rRNA genes is developmentally
- 25 regulated in *Brassica*." *Proc Natl Acad Sci U S A* **94**(7): 3442-3447.
- 26 Coen, E. S. and G. A. Dover (1982). "Multiple Pol I initiation sequences in rDNA spacers of
- 27 *Drosophila melanogaster*." *Nucleic Acids Res* **10**(21): 7017-7026.
- 28 Costa-Nunes, P., O. Pontes, S. B. Preuss and C. S. Pikaard (2010). "Extra views on RNA-
- 29 dependent DNA methylation and MBD6-dependent heterochromatin formation in nucleolar
- 30 dominance." *Nucleus* **1**(3): 254-259.
- 31 Croce, C. M., A. Talavera, C. Basilico and O. J. Miller (1977). "Suppression of production of
- 32 mouse 28S ribosomal RNA in mouse-human hybrids segregating mouse chromosomes." *Proc*
- 33 *Natl Acad Sci U S A* **74**(2): 694-697.
- 34 Durica, D. S. and H. M. Krider (1977). "Studies on the ribosomal RNA cistrons in interspecific
- 35 *Drosophila* hybrids. I. Nucleolar dominance." *Dev Biol* **59**(1): 62-74.
- 36 Earley, K., R. J. Lawrence, O. Pontes, R. Reuther, A. J. Enciso, M. Silva, N. Neves, M. Gross, W.
- 37 Viegas and C. S. Pikaard (2006). "Erasure of histone acetylation by *Arabidopsis* HDA6 mediates
- 38 large-scale gene silencing in nucleolar dominance." *Genes Dev* **20**(10): 1283-1293.
- 39 Earley, K. W., F. Pontvianne, A. T. Wierzbicki, T. Blevins, S. Tucker, P. Costa-Nunes, O. Pontes
- 40 and C. S. Pikaard (2010). "Mechanisms of HDA6-mediated rRNA gene silencing: suppression of
- 41 intergenic Pol II transcription and differential effects on maintenance versus siRNA-directed
- 42 cytosine methylation." *Genes Dev* **24**(11): 1119-1132.
- 43
- 44

- 1 Engels, W. R. and C. R. Preston (1979). "Hybrid dysgenesis in *Drosophila melanogaster*: the  
2 biology of female and male sterility." Genetics **92**(1): 161-174.
- 3 Felle, M., J. H. Exler, R. Merkl, K. Dachauer, A. Brehm, I. Grummt and G. Langst (2010). "DNA  
4 sequence encoded repression of rRNA gene transcription in chromatin." Nucleic Acids Res  
5 **38**(16): 5304-5314.
- 6 Ghoshal, K., S. Majumder, J. Datta, T. Motiwala, S. Bai, S. M. Sharma, W. Frankel and S. T. Jacob  
7 (2004). "Role of human ribosomal RNA (rRNA) promoter methylation and of methyl-CpG-  
8 binding protein MBD2 in the suppression of rRNA gene expression." J Biol Chem **279**(8): 6783-  
9 6793.
- 10 Greil, F. and K. Ahmad (2012). "Nucleolar dominance of the Y chromosome in *Drosophila*  
11 *melanogaster*." Genetics **191**(4): 1119-1128.
- 12 Grewal, S. S., L. Li, A. Orian, R. N. Eisenman and B. A. Edgar (2005). "Myc-dependent regulation  
13 of ribosomal RNA synthesis during *Drosophila* development." Nat Cell Biol **7**(3): 295-302.
- 14 Grimaldi, G., P. Fiorentini and P. P. Di Nocera (1990). "Spacer promoters are orientation-  
15 dependent activators of pre-rRNA transcription in *Drosophila melanogaster*." Mol Cell Biol  
16 **10**(9): 4667-4677.
- 17 Heix, J. and I. Grummt (1995). "Species specificity of transcription by RNA polymerase I." Curr  
18 Opin Genet Dev **5**(5): 652-656.
- 19 Heliot, L., F. Mongelard, C. Klein, M. F. O'Donohue, J. M. Chassery, M. Robert-Nicoud and Y.  
20 Usson (2000). "Nonrandom distribution of metaphase AgNOR staining patterns on human  
21 acrocentric chromosomes." J Histochem Cytochem **48**(1): 13-20.
- 22 Houchins, K., M. O'Dell, R. B. Flavell and J. P. Gustafson (1997). "Cytosine methylation and  
23 nucleolar dominance in cereal hybrids." Mol Gen Genet **255**(3): 294-301.
- 24 Jagannathan, M., N. Warsinger-Pepe, G. J. Watase and Y. M. Yamashita (2017). "Comparative  
25 Analysis of Satellite DNA in the *Drosophila melanogaster* Species Complex." G3 (Bethesda) **7**(2):  
26 693-704.
- 27 Kidd, S. J. and D. M. Glover (1981). "*Drosophila melanogaster* ribosomal DNA containing type II  
28 insertions is variably transcribed in different strains and tissues." J Mol Biol **151**(4): 645-662.
- 29 Labhart, P. and R. H. Reeder (1984). "Enhancer-like properties of the 60/81 bp elements in the  
30 ribosomal gene spacer of *Xenopus laevis*." Cell **37**(1): 285-289.
- 31 Larracunte, A. M. and P. M. Ferree (2015). "Simple method for fluorescence DNA in situ  
32 hybridization to squashed chromosomes." J Vis Exp(95): 52288.
- 33 Lawrence, R. J., K. Earley, O. Pontes, M. Silva, Z. J. Chen, N. Neves, W. Viegas and C. S. Pikaard  
34 (2004). "A concerted DNA methylation/histone methylation switch regulates rRNA gene dosage  
35 control and nucleolar dominance." Mol Cell **13**(4): 599-609.
- 36 Levesque, M. J., P. Ginart, Y. Wei and A. Raj (2013). "Visualizing SNVs to quantify allele-specific  
37 expression in single cells." Nat Methods **10**(9): 865-867.
- 38 Long, E. O. and I. B. Dawid (1980). "Repeated genes in eukaryotes." Annu Rev Biochem **49**: 727-  
39 764.
- 40 Lu, K. L., J. O. Nelson, G. J. Watase, N. Warsinger-Pepe and Y. M. Yamashita (2018).  
41 "Transgenerational dynamics of rDNA copy number in *Drosophila* male germline stem cells."  
42 Elife **7**.
- 43 Macleod, D. and A. Bird (1982). "DNAase I sensitivity and methylation of active versus inactive  
44 rRNA genes in xenopus species hybrids." Cell **29**(1): 211-218.

- 1 Mayer, C., K. M. Schmitz, J. Li, I. Grummt and R. Santoro (2006). "Intergenic transcripts regulate  
2 the epigenetic state of rRNA genes." Mol Cell **22**(3): 351-361.
- 3 Mohannath, G., F. Pontvianne and C. S. Pikaard (2016). "Selective nucleolus organizer  
4 inactivation in Arabidopsis is a chromosome position-effect phenomenon." Proc Natl Acad Sci U  
5 S A **113**(47): 13426-13431.
- 6 Moss, T. and V. Y. Stefanovsky (2002). "At the center of eukaryotic life." Cell **109**(5): 545-548.
- 7 Murayama, A., K. Ohmori, A. Fujimura, H. Minami, K. Yasuzawa-Tanaka, T. Kuroda, S. Oie, H.  
8 Daitoku, M. Okuwaki, K. Nagata, A. Fukamizu, K. Kimura, T. Shimizu and J. Yanagisawa (2008).  
9 "Epigenetic control of rDNA loci in response to intracellular energy status." Cell **133**(4): 627-  
10 639.
- 11 Neves, N., J. S. Heslop-Harrison and W. Viegas (1995). "rRNA gene activity and control of  
12 expression mediated by methylation and imprinting during embryo development in wheat x rye  
13 hybrids." Theor Appl Genet **91**(3): 529-533.
- 14 Peng, J. C. and G. H. Karpen (2007). "H3K9 methylation and RNA interference regulate nucleolar  
15 organization and repeated DNA stability." Nat Cell Biol **9**(1): 25-35.
- 16 Pikaard, C. S. (2000). "Nucleolar dominance: uniparental gene silencing on a multi-megabase  
17 scale in genetic hybrids." Plant Mol Biol **43**(2-3): 163-177.
- 18 Pontes, O., R. J. Lawrence, M. Silva, S. Preuss, P. Costa-Nunes, K. Earley, N. Neves, W. Viegas  
19 and C. S. Pikaard (2007). "Postembryonic establishment of megabase-scale gene silencing in  
20 nucleolar dominance." PLoS One **2**(11): e1157.
- 21 Pontes, O., C. F. Li, P. Costa Nunes, J. Haag, T. Ream, A. Vitins, S. E. Jacobsen and C. S. Pikaard  
22 (2006). "The Arabidopsis chromatin-modifying nuclear siRNA pathway involves a nucleolar RNA  
23 processing center." Cell **126**(1): 79-92.
- 24 Pontes, O., N. Neves, M. Silva, M. S. Lewis, A. Madlung, L. Comai, W. Viegas and C. S. Pikaard  
25 (2004). "Chromosomal locus rearrangements are a rapid response to formation of the  
26 allotetraploid Arabidopsis suecica genome." Proc Natl Acad Sci U S A **101**(52): 18240-18245.
- 27 Pontvianne, F., T. Blevins, C. Chandrasekhara, W. Feng, H. Stroud, S. E. Jacobsen, S. D. Michaels  
28 and C. S. Pikaard (2012). "Histone methyltransferases regulating rRNA gene dose and dosage  
29 control in Arabidopsis." Genes Dev **26**(9): 945-957.
- 30 Preuss, S. and C. S. Pikaard (2007). "rRNA gene silencing and nucleolar dominance: insights into  
31 a chromosome-scale epigenetic on/off switch." Biochim Biophys Acta **1769**(5-6): 383-392.
- 32 Preuss, S. B., P. Costa-Nunes, S. Tucker, O. Pontes, R. J. Lawrence, R. Mosher, K. D. Kasschau, J.  
33 C. Carrington, D. C. Baulcombe, W. Viegas and C. S. Pikaard (2008). "Multimegabase silencing in  
34 nucleolar dominance involves siRNA-directed DNA methylation and specific methylcytosine-  
35 binding proteins." Mol Cell **32**(5): 673-684.
- 36 Probst, A. V., M. Fagard, F. Proux, P. Mourrain, S. Boutet, K. Earley, R. J. Lawrence, C. S. Pikaard,  
37 J. Murfett, I. Furner, H. Vaucheret and O. Mittelsten Scheid (2004). "Arabidopsis histone  
38 deacetylase HDA6 is required for maintenance of transcriptional gene silencing and determines  
39 nuclear organization of rDNA repeats." Plant Cell **16**(4): 1021-1034.
- 40 Reeder, R. H., J. G. Roan and M. Dunaway (1983). "Spacer regulation of Xenopus ribosomal  
41 gene transcription: competition in oocytes." Cell **35**(2 Pt 1): 449-456.
- 42 Roussel, P., C. Andre, L. Comai and D. Hernandez-Verdun (1996). "The rDNA transcription  
43 machinery is assembled during mitosis in active NORs and absent in inactive NORs." J Cell Biol  
44 **133**(2): 235-246.

- 1 Santoro, R. and I. Grummt (2005). "Epigenetic mechanism of rRNA gene silencing: temporal  
2 order of NoRC-mediated histone modification, chromatin remodeling, and DNA methylation."  
3 Mol Cell Biol **25**(7): 2539-2546.
- 4 Schlotterer, C., M. T. Hauser, A. von Haeseler and D. Tautz (1994). "Comparative evolutionary  
5 analysis of rDNA ITS regions in *Drosophila*." Mol Biol Evol **11**(3): 513-522.
- 6 Schmitz, K. M., C. Mayer, A. Postepska and I. Grummt (2010). "Interaction of noncoding RNA  
7 with the rDNA promoter mediates recruitment of DNMT3b and silencing of rRNA genes." Genes  
8 Dev **24**(20): 2264-2269.
- 9 Smetana, K. and H. Busch (1964). "STUDIES ON THE ULTRASTRUCTURE OF THE NUCLEOLI OF  
10 THE WALKER TUMOR AND RAT LIVER." Cancer Res **24**: 537-557.
- 11 Tautz, D., J. M. Hancock, D. A. Webb, C. Tautz and G. A. Dover (1988). "Complete sequences of  
12 the rRNA genes of *Drosophila melanogaster*." Mol Biol Evol **5**(4): 366-376.
- 13 Tautz, D., C. Tautz, D. Webb and G. A. Dover (1987). "Evolutionary divergence of promoters and  
14 spacers in the rDNA family of four *Drosophila* species. Implications for molecular coevolution in  
15 multigene families." J Mol Biol **195**(3): 525-542.
- 16 Tucker, S., A. Vitins and C. S. Pikaard (2010). "Nucleolar dominance and ribosomal RNA gene  
17 silencing." Curr Opin Cell Biol **22**(3): 351-356.
- 18 Wilk, R., S. U. M. Murthy, H. Yan and H. M. Krause (2010). "In Situ Hybridization: Fruit Fly  
19 Embryos and Tissues." Current Protocols Essential Laboratory Techniques **4**(1): 9.3.1-9.3.24.
- 20 Zhou, J., T. B. Sackton, L. Martinsen, B. Lemos, T. H. Eickbush and D. L. Hartl (2012). "Y  
21 chromosome mediates ribosomal DNA silencing and modulates the chromatin state in  
22 *Drosophila*." Proc Natl Acad Sci U S A **109**(25): 9941-9946.

23  
24  
25  
26
